# Supplementary material for: Side chain effects on the solid-state emission behaviours and mechano-fluorochromic activities of 10H-phenothiazinylbenzo[d]imidazoles
Source: Royal Society of Chemistry journal article supplement (doi:10.1039/c9ra05255k), 2019-01-01

## Electronic Supplementary Information(ESI)

### Side chain effect on solid-state emission behaviours and mechanofluorochromic activities of 10*H*-phenothiazinylbenzo[*d*]imidazoles

Hao Jiang, Xiaojing Liu, Yanrong Jia, Tianhui Xu and Min Xia\*

( Department of Chemistry, Zhejiang Sci-Tech University, Hangzhou 310018, P. R. China )

E-mail: [xiamin@zstu.edu.cn](mailto:xiamin@zstu.edu.cn)

#### Materials and instruments

All the reagents were analytically pure and some chemicals were further purified by recrystallization or distillation. Melting points were determined by an OptiMelt automatic melting point system. The <sup>1</sup>H NMR (400 MHz) and <sup>13</sup>C NMR (100 MHz) spectra were obtained on a Bruker Avance II DMX 400 spectrometer with DMSO-*d*<sub>6</sub> or CDCl<sub>3</sub> as the solvent. The absorption spectra were measured on a Shimadzu UV 3600 UV-Vis-NIR spectrometer, and the fluorescence spectra were acquired on a Perkin-Elmer LS55 spectrophotometer. The quantum yields were measured with quinine sulfate in 0.1 M sulfuric acid solution ( $\Phi_f=0.55$ ) as the reference. The crystallographic data were determined on a Bruker Gemini Ultra diffractometer with a CCD counter. The powder X-ray diffraction patterns were recorded on DX2700 with Cu-K $\alpha$  radiation operating at 40 kV and 40 mA by a 0.3°/min scanning rate. Differential scanning calorimetry curves were obtained on a Waters TA Q20 instrument. ML spectrum are recorded on an optical fiber spectrometer with the fiber in 1000  $\mu$ m diameter and 200-1100 nm acceptable wavelength range.

#### Synthesis of the intermediates and the titled BIMP compounds

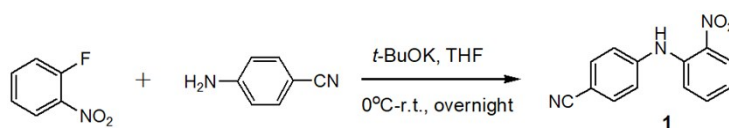

At 0°C, 4-cyanoaniline (12 mmol, 1.42 g) in anhydrous THF (15 mL) was slowly dropped into the mixture of 2-fluoronitrobenzene (10 mmol, 1.41 g) and *t*-BuOK (12 mmol, 1.34 g) in anhydrous THF (15 mL). The resulted mixture was stirred at 0°C for another 1h and then at room temperature overnight. Water (100 mL) was added and the solution was extracted with ethyl acetate (2×15 mL). The combined organic layers were dried over anhydrous Na<sub>2</sub>SO<sub>4</sub> and then filtrated. The solvent was removed from the filtrate under reduced pressure and the residue was purified by silica gel column chromatography using petroleum ether/CH<sub>2</sub>Cl<sub>2</sub> mixture as the eluent, producing **1** as orange solid.

4-(2-nitrophenylamino)benzonitrile (**1**): 77% yield; m.p. 182.3-183.9 °C; <sup>1</sup>H NMR(400 MHz, CDCl<sub>3</sub>)  $\delta$ (ppm): 6.99(dt,  $J_1=2.0$  Hz,  $J_2=6.8$  Hz, 1H), 7.33(d,  $J=8.8$  Hz, 2H), 7.46-7.54(m, 2H), 7.66(d,  $J=8.8$  Hz, 2H), 8.22(dd,  $J_1=1.2$  Hz,  $J_2=8.8$  Hz, 1H), 9.43(s, 1H); <sup>13</sup>C NMR(100 MHz, CDCl<sub>3</sub>)  $\delta$ (ppm): 106.86, 117.35, 118.78, 120.23, 121.21, 126.91, 133.86, 135.63, 135.69, 139.50, 143.78.

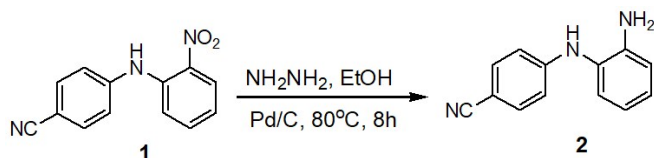

At room temperature, hydrazine hydrate (80%wt, 20 mmol) was added into the suspension of **1** (5 mmol) and palladium absorbed on carbon powder (10%wt, 0.25 mmol) in EtOH (15 mL). The resulted mixture was heated at 80°C for 8 h and then cooled to room temperature. After filtration, the filtrate was diluted with water (100 mL) and extracted with EtOAc (2×15 mL). The combined organic layers were dried over anhydrous Na<sub>2</sub>SO<sub>4</sub> and the filtrate was concentrated under reduced pressure. The residue was purified by silica gel column chromatography using petroleum ether/EtOAc mixture as the eluent, producing **2** as greyish white solid.

**4-(2-aminophenylamino)benzonitrile (2)**: 88% yield; m.p.159.4-161.2°C; <sup>1</sup>H NMR(400 MHz, CDCl<sub>3</sub>) δ(ppm): 3.83(s, br, 2H), 5.72(s, 1H), 6.72(dt, *J*<sub>1</sub>=8.8 Hz, *J*<sub>2</sub>=2.0 Hz, 2H), 6.83(td, *J*<sub>1</sub>=7.6 Hz, *J*<sub>2</sub>=1.2 Hz, 1H), 6.87(d, *J*=7.6 Hz, 1H), 7.15(d, *J*=7.6 Hz, 2H), 7.47(dt, *J*<sub>1</sub>=8.8 Hz, *J*<sub>2</sub>=2.0 Hz, 2H); <sup>13</sup>C NMR(100 MHz, CDCl<sub>3</sub>) δ(ppm): 100.61, 113.99, 116.41, 119.19, 120.14, 125.19, 127.03, 127.77, 133.77, 143.00, 149.59.

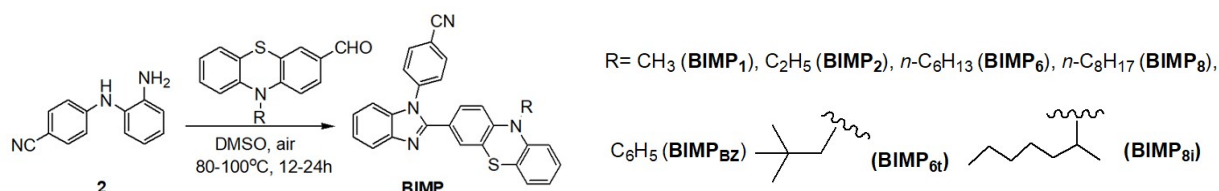

At room temperature, 10-alkyl-10H-phenothiazine-3-carbaldehyde (12 mmol) was added into the solution of **2** (10 mmol) in DMSO (20 mL) and the resulted solution was stirred at 80-100°C in an open vessel for 12-24 h. After cooled to room temperature, the solution was diluted with water (100 mL) and extracted with CH<sub>2</sub>Cl<sub>2</sub> (2×15 mL). The combined organic layers were dried over anhydrous Na<sub>2</sub>SO<sub>4</sub> and the filtrate was concentrated under reduced pressure. The residue was purified by silica gel column chromatography using petroleum ether/CH<sub>2</sub>Cl<sub>2</sub> mixture as the eluent, producing **BIMP** as pale to dark yellow solid or oil. All the products were recrystallized in EtOH/ CH<sub>2</sub>Cl<sub>2</sub> mixture to offer the corresponding solids used for all types of measurements.

**4-(2-(10-methyl-10H-phenothiazin-3-yl)-1H-benzo[d]imidazol-1-yl)benzonitrile (BIMP<sub>1</sub>)**: 87% yield; m.p. 227.9-229.3°C; <sup>1</sup>H NMR (400 MHz, DMSO-d<sub>6</sub>) δ (ppm): 3.33(s, 3H), 6.64(d, *J*=8.4 Hz, 1H), 6.79(dd, *J*<sub>1</sub>=1.2 Hz, *J*<sub>2</sub>=8.4 Hz, 1H), 6.94(dt, *J*<sub>1</sub>=1.2 Hz, *J*<sub>2</sub>=7.6 Hz, 1H), 7.07(dd, *J*<sub>1</sub>=1.5 Hz, *J*<sub>2</sub>=8.4 Hz, 1H), 7.10(dd, *J*<sub>1</sub>=1.2 Hz, *J*<sub>2</sub>=7.6 Hz, 1H), 7.16(dt, *J*<sub>1</sub>=1.2 Hz, *J*<sub>2</sub>=7.6 Hz, 1H), 7.20-7.29(m, 2H), 7.35(dt, *J*<sub>1</sub>=1.2 Hz, *J*<sub>2</sub>=6.8 Hz, 1H), 7.41-7.44(m, 3H), 7.80(dt, *J*<sub>1</sub>=1.5 Hz, *J*<sub>2</sub>=8.4 Hz, 2H), 7.86(dt, *J*<sub>1</sub>=1.2 Hz, *J*<sub>2</sub>=7.6 Hz, 1H); <sup>13</sup>C NMR (100 MHz, DMSO-d<sub>6</sub>) δ (ppm): 35.45, 109.80, 112.29, 113.88, 114.40, 117.89, 120.05, 122.66, 123.09, 123.14, 123.64, 123.76, 124.05, 127.27, 127.70, 127.93, 128.06, 128.66, 133.87, 136.27, 141.03, 143.17, 144.79, 147.18, 151.46.

**4-(2-(10-ethyl-10H-phenothiazin-3-yl)-1H-benzo[d]imidazol-1-yl)benzonitrile (BIMP<sub>2</sub>)**: 81% yield; m.p. 198.7-200.7°C; <sup>1</sup>H NMR (400 MHz, DMSO-d<sub>6</sub>) δ (ppm): 1.31(t, *J*=6.8 Hz, 3H), 3.92(q, *J*=6.8Hz, 2H), 7.00(d, *J*=8.4 Hz, 2H), 7.06(d, *J*=7.2 Hz, 1H), 7.16-7.19(m, 2H), 7.22-7.39(m, 5H), 7.73(d, *J*=8.4 Hz, 2H), 7.81(d, *J*=7.6 Hz, 1H), 8.13(d, *J*=8.4 Hz, 2H); <sup>13</sup>C NMR (100 MHz, DMSO-d<sub>6</sub>) δ (ppm): 12.97, 41.73, 110.68, 111.83, 115.32, 116.21, 118.67, 119.78, 122.47, 123.20, 123.39, 123.55, 123.64, 123.92, 127.58, 127.91, 128.34, 129.11, 134.70, 136.92, 141.07, 143.17, 143.77, 146.00, 151.40.

*4-(2-(10-hexyl-10H-phenothiazin-3-yl)-1H-benzo[d]imidazol-1-yl)benzotrile (BIMP<sub>6</sub>)*: 77% yield; m.p. 146.6-148.2 °C; <sup>1</sup>H NMR (400 MHz, DMSO-d<sub>6</sub>) δ (ppm): 0.91(t, *J*=6.8 Hz, 3H), 1.33-1.45(m, 6H), 1.81(hep, *J*=7.2 Hz, 2H), 3.84(t, *J*=7.2 Hz, 2H), 6.74(d, *J*=8.4 Hz, 1H), 6.88(d, *J*=8.0 Hz, 1H), 6.97(t, *J*=7.2 Hz, 1H), 7.11-7.14(m, 2H), 7.19(t, *J*=8.0 Hz, 1H), 7.25-7.33(m, 2H), 7.39(t, *J*=8.0 Hz, 1H), 7.44(d, *J*=2.0 Hz, 1H), 7.48(d, *J*=8.0 Hz, 2H), 7.85(d, *J*=8.0 Hz, 2H), 7.90(d, *J*=8.0 Hz, 1H); <sup>13</sup>C NMR (100 MHz, DMSO-d<sub>6</sub>) δ (ppm): 14.01, 22.59, 26.55, 26.70, 31.42, 47.64, 109.78, 112.27, 114.72, 115.61, 117.92, 120.06, 122.94, 122.98, 123.62, 123.72, 123.98, 125.25, 127.45, 127.52, 128.06, 128.17, 128.42, 133.88, 136.29, 141.06, 143.21, 144.19, 146.76, 151.50.

*4-(2-(10-(3,3-dimethylbutyl)-10H-phenothiazin-3-yl)-1H-benzo[d]imidazol-1-yl)benzotrile (BIMP<sub>6t</sub>)*: 64% yield, m.p. 102.5-104.2 °C; <sup>1</sup>H NMR (400 MHz, DMSO-d<sub>6</sub>) δ (ppm): 6.98(s, 9H), 1.60(dt, *J*<sub>1</sub>=7.6 Hz, *J*<sub>2</sub>=1.2 Hz, 2H), 3.89(dt, *J*<sub>1</sub>=7.6 Hz, *J*<sub>2</sub>=1.2 Hz, 2H), 6.96-7.01(m, 2H), 7.05(d, *J*=8.0 Hz, 1H), 7.15-7.38(m, 7H), 7.70(d, *J*=8.4 Hz, 2H), 7.80(d, *J*=7.6 Hz, 1H), 8.09(d, *J*=8.4 Hz, 2H), 8.35(s, 1H); <sup>13</sup>C NMR (100 MHz, DMSO-d<sub>6</sub>) δ (ppm): 29.60, 30.33, 43.63, 79.64, 110.66, 111.83, 115.70, 116.56, 118.61, 119.80, 123.42, 123.45, 123.59, 123.75, 123.90, 124.16, 127.73, 128.09, 128.29, 129.07, 129.11, 134.64, 136.92, 141.05, 143.20, 144.31, 146.57, 151.44.

*4-(2-(10-phenyl-10H-phenothiazin-3-yl)-1H-benzo[d]imidazol-1-yl)benzotrile (BIMP<sub>Bz</sub>)*: 68% yield; m.p. 251.2-253.1 °C; <sup>1</sup>H NMR (400 MHz, DMSO-d<sub>6</sub>) δ (ppm): 6.02(d, *J*=8.8 Hz, 1H), 6.13-6.16(m, 1H), 6.73(dd, *J*<sub>1</sub>=8.8 Hz, *J*<sub>2</sub>=2.0 Hz, 1H), 6.83-6.87(m, 2H), 6.99-7.01(m, 1H), 7.22(d, *J*=8.0 Hz, 1H), 7.27-7.31(m, 1H), 7.35-7.40(m, 4H), 7.47(d, *J*=8.8 Hz, 2H), 7.54(t, *J*=8.0 Hz, 1H), 7.65(t, *J*=8.0 Hz, 2H), 7.83(d, *J*=8.0 Hz, 2H), 7.88(d, *J*=8.0 Hz, 1H); <sup>13</sup>C NMR (100 MHz, DMSO-d<sub>6</sub>) δ (ppm): 109.73, 112.30, 114.91, 116.10, 117.89, 119.16, 120.04, 120.43, 123.01, 123.05, 123.59, 123.69, 126.70, 127.07, 127.56, 127.87, 128.05, 128.76, 130.94, 131.05, 133.87, 136.34, 140.21, 141.07, 143.20, 143.32, 145.53, 151.29.

*4-(2-(10-octyl-10H-phenothiazin-3-yl)-1H-benzo[d]imidazol-1-yl)benzotrile (BIMP<sub>8</sub>)*: 71% yield; m.p. 143.7-145.1 °C; <sup>1</sup>H NMR (400 MHz, DMSO-d<sub>6</sub>) δ (ppm): 0.91(t, *J*=7.2 Hz, 3H), 1.28(m, 8H), 1.45(hep, *J*=7.2 Hz, 2H), 1.81(hep, *J*=7.2 Hz, 2H), 3.83(t, *J*=7.2 Hz, 2H), 6.74(d, *J*=8.8 Hz, 1H), 6.87(d, *J*=8.0 Hz, 1H), 6.96(t, *J*=7.6 Hz, 1H), 7.13(d, *J*=8.4 Hz, 2H), 7.19(t, *J*=8.4 Hz, 1H), 7.26(d, *J*=8.0 Hz, 1H), 7.33(m, 1H), 7.39(t, *J*=7.2 Hz, 1H), 7.43(d, *J*=2 Hz, 1H), 7.48(d, *J*=8.8 Hz, 2H), 7.84(d, *J*=8.4 Hz, 2H), 7.90(d, *J*=8.0 Hz, 1H); <sup>13</sup>C NMR (100 MHz, DMSO-d<sub>6</sub>) δ (ppm): 14.12, 22.63, 26.73, 26.78, 26.88, 29.18, 29.20, 31.74, 47.64, 109.78, 112.28, 114.70, 115.61, 117.90, 120.04, 122.93, 122.97, 123.61, 123.71, 123.97, 125.22, 127.44, 127.51, 128.06, 128.14, 128.42, 133.57, 136.29, 141.06, 143.20, 144.17, 146.77, 151.50.

*4-(2-(10-(2-methylheptyl)-10H-phenothiazin-3-yl)-1H-benzo[d]imidazol-1-yl)benzotrile (BIMP<sub>8i</sub>)*: 78% yield; m.p. 153.4-154.9 °C; <sup>1</sup>H NMR (400 MHz, DMSO-d<sub>6</sub>) δ (ppm): 0.75-0.80(m, 6H), 1.17-1.38(m, 8H), 1.75-1.78(m, 1H), 3.73-3.76(m, 2H), 6.93-6.97(m, 2H), 7.03(d, *J*=8.4 Hz, 1H), 7.11-7.33(m, 6H), 7.39(d, *J*=2 Hz, 1H), 7.65(d, *J*=8.4 Hz, 2H), 7.76(d, *J*=8.0 Hz, 1H), 8.03(d, *J*=8.4 Hz, 2H); <sup>13</sup>C NMR (100 MHz, DMSO-d<sub>6</sub>) δ (ppm): 10.79, 14.24, 22.80, 23.74, 28.28, 30.21, 35.87, 50.72, 110.66, 111.82, 116.22, 117.12, 118.60, 119.81, 123.49, 123.53, 123.81, 123.90, 124.20, 124.95, 127.84, 128.21, 128.26, 128.99, 129.06, 134.60, 136.92, 141.06, 143.22, 144.80, 147.03, 151.52.

**Table S1** Crystallographic data for **BIMP<sub>1</sub>**, **BIMP<sub>2</sub>** and **BIMP<sub>6</sub>**

|                                                   | <b>BIMP<sub>1</sub> (CCDC 1919632)</b> | <b>BIMP<sub>2</sub> (1919633)</b> | <b>BIMP<sub>6</sub> (CCDC1919634)</b> |
|---------------------------------------------------|----------------------------------------|-----------------------------------|---------------------------------------|
|                                                   | $a = 7.9212(3) \text{ \AA}$            | $a = 8.5519(7) \text{ \AA}$       | $a = 8.6242(2) \text{ \AA}$           |
|                                                   | $b = 9.5348(3) \text{ \AA}$            | $b = 10.6954(8) \text{ \AA}$      | $b = 13.3809(3) \text{ \AA}$          |
|                                                   | $c = 14.0962(5) \text{ \AA}$           | $c = 12.9906(11) \text{ \AA}$     | $c = 11.9133(3) \text{ \AA}$          |
|                                                   | $\alpha = 88.056(1)^\circ$             | $\alpha = 87.540(7)^\circ$        | $\alpha = 90^\circ$                   |
|                                                   | $\beta = 89.137(1)^\circ$              | $\beta = 74.165(7)^\circ$         | $\beta = 108.743(1)^\circ$            |
|                                                   | $\gamma = 84.091(1)^\circ$             | $\gamma = 76.420(7)^\circ$        | $\gamma = 90^\circ$                   |
| Temperature                                       | 170 K                                  | 293 K                             | 170 K                                 |
| Wavelength                                        | 0.71073 \AA                            | 0.71073 \AA                       | 0.71073 \AA                           |
| Volume                                            | 1058.31(6)                             | 1110.87(16)                       | 1301.88(5)                            |
| Space group                                       | P <sub>-1</sub>                        | P <sub>-1</sub>                   | P <sub>21</sub>                       |
| Hall group                                        | -P <sub>1</sub>                        | -P <sub>1</sub>                   | P <sub>2yb</sub>                      |
| Density                                           | 1.351 g/cm <sup>3</sup>                | 1.329 g/cm <sup>3</sup>           | 1.277 g/cm <sup>3</sup>               |
| Z                                                 | 2                                      | 2                                 | 2                                     |
| <i>Mu</i>                                         | 0.176 / mm                             | 0.170 / mm                        | 0.153 / mm                            |
| <i>F</i> <sub>000</sub>                           | 448.0                                  | 464.0                             | 528.0                                 |
| <i>h, k, l</i> (max)                              | 13, 16, 23                             | 10, 12, 15                        | 12, 19, 17                            |
| <i>N</i> <sub>ref</sub>                           | 10807                                  | 4069                              | 7405                                  |
| <i>T</i> <sub>min</sub> , <i>T</i> <sub>max</sub> | 0.937, 0.981                           | 0.920, 0.934                      | 0.695, 0.746                          |
| Data completeness                                 | 0.987                                  | 0.998                             | 1.79/0.93                             |
| $\theta$ (max)                                    | 37.076                                 | 25.348                            | 30.521                                |
| <i>R</i> <sub>reflections</sub>                   | 0.0466 (8253)                          | 0.0481 (2894)                     | 0.0317 (6879)                         |
| <i>wR</i> <sup>2</sup> <sub>reflections</sub>     | 0.1342 (10671)                         | 0.1262 (4059)                     | 0.0821 (7405)                         |
| <i>S</i>                                          | 1.025                                  | 1.025                             | 1.037                                 |
| <i>N</i> <sub>par</sub>                           | 290                                    | 290                               | 335                                   |
| Flack parameter                                   | ----                                   | ----                              | 0.033 (0.015)                         |

**Table S2** Crystallographic data for **BIMP<sub>6t</sub>**, **BIMP<sub>8</sub>** and **BIMP<sub>BZ</sub>**

|                                                   | <b>BIMP<sub>6t</sub>·CHCl<sub>3</sub> (CCDC1919636)</b> | <b>BIMP<sub>8</sub> (CCDC1919635)</b> | <b>BIMP<sub>BZ</sub> (CCDC1919637)</b> |
|---------------------------------------------------|---------------------------------------------------------|---------------------------------------|----------------------------------------|
|                                                   | $a = 13.5139(3) \text{ \AA}$                            | $a = 11.5485(12) \text{ \AA}$         | $a = 9.8655(4) \text{ \AA}$            |
|                                                   | $b = 15.4850(4) \text{ \AA}$                            | $b = 8.0467(7) \text{ \AA}$           | $b = 10.2689(4) \text{ \AA}$           |
|                                                   | $c = 15.7111(3) \text{ \AA}$                            | $c = 31.393(4) \text{ \AA}$           | $c = 12.5214(5) \text{ \AA}$           |
|                                                   | $\alpha = 90^\circ$                                     | $\alpha = 90^\circ$                   | $\alpha = 87.488(1)^\circ$             |
|                                                   | $\beta = 110.006(1)^\circ$                              | $\beta = 93.842(4)^\circ$             | $\beta = 70.801(1)^\circ$              |
|                                                   | $\gamma = 90^\circ$                                     | $\gamma = 90^\circ$                   | $\gamma = 83.510(1)^\circ$             |
| Temperature                                       | 170 K                                                   | 273 K                                 | 170 K                                  |
| Wavelength                                        | 0.71073 \AA                                             | 0.71073 \AA                           | 0.71073 \AA                            |
| Volume                                            | 3089.35(12)                                             | 2910.8(5)                             | 1190.26(8)                             |
| Space group                                       | P <sub>21/n</sub>                                       | P <sub>21/n</sub>                     | P <sub>-1</sub>                        |
| Hall group                                        | -P <sub>2yn</sub>                                       | -P <sub>2yn</sub>                     | -P <sub>1</sub>                        |
| Density                                           | 1.333 g/cm <sup>3</sup>                                 | 1.206 g/cm <sup>3</sup>               | 1.374 g/cm <sup>3</sup>                |
| Z                                                 | 4                                                       | 4                                     | 2                                      |
| <i>Mu</i>                                         | 0.349 / mm                                              | 0.140 / mm                            | 0.166 / mm                             |
| <i>F</i> <sub>000</sub>                           | 1288.0                                                  | 1120.0                                | 512.0                                  |
| <i>h, k, l</i> (max)                              | 16, 19, 19                                              | 16, 11, 44                            | 12, 12, 15                             |
| <i>N</i> <sub>ref</sub>                           | 6274                                                    | 8464                                  | 4837                                   |
| <i>T</i> <sub>min</sub> , <i>T</i> <sub>max</sub> | 0.689, 0.745                                            | 0.709, 0.746                          | 0.689, 0.745                           |
| Data completeness                                 | 0.992                                                   | 0.992                                 | 0.989                                  |
| $\vartheta$ (max)                                 | 26.386                                                  | 30.056                                | 26.392                                 |
| <i>R</i> <sub>reflections</sub>                   | 0.0441(5333)                                            | 0.1046(4654)                          | 0.0344(4418)                           |
| <i>wR</i> <sup>2</sup> <sub>reflections</sub>     | 0.1151(6274)                                            | 0.3696(8464)                          | 0.0916(4837)                           |
| <i>S</i>                                          | 1.038                                                   | 1.278                                 | 1.044                                  |
| <i>N</i> <sub>par</sub>                           | 401                                                     | 382                                   | 334                                    |

**Table S3** Crystallographic data for **BIMP<sub>8i</sub>**

| <b>BIMP<sub>8i</sub> (CCDC1919652)</b>            |                             |
|---------------------------------------------------|-----------------------------|
|                                                   | $a = 7.7139(3)\text{\AA}$   |
|                                                   | $b = 11.3447(4)\text{\AA}$  |
|                                                   | $c = 16.7455(7)\text{\AA}$  |
|                                                   | $\alpha = 100.235(1)^\circ$ |
|                                                   | $\beta = 91.830(1)^\circ$   |
|                                                   | $\gamma = 94.809(1)^\circ$  |
| Temperature                                       | 170 K                       |
| Wavelength                                        | 0.71073 \AA                 |
| Volume                                            | 1435.39(10)                 |
| Space group                                       | P <sub>-1</sub>             |
| Hall group                                        | -P <sub>1</sub>             |
| Density                                           | 1.223 g/cm <sup>3</sup>     |
| Z                                                 | 2                           |
| <i>Mu</i>                                         | 0.142/ mm                   |
| <i>F</i> <sub>000</sub>                           | 560.0                       |
| <i>h, k, l</i> (max)                              | 9, 14, 21                   |
| <i>N</i> <sub>ref</sub>                           | 6306                        |
| <i>T</i> <sub>min</sub> , <i>T</i> <sub>max</sub> | 0.674, 0.746                |
| Data completeness                                 | 0.992                       |
| $\theta$ (max)                                    | 27.148                      |
| <i>R</i> <sub>reflections</sub>                   | 0.0965(5374)                |
| <i>wR</i> <sup>2</sup> <sub>reflections</sub>     | 0.2721(6306)                |
| <i>S</i>                                          | 1.063                       |
| <i>N</i> <sub>par</sub>                           | 373                         |

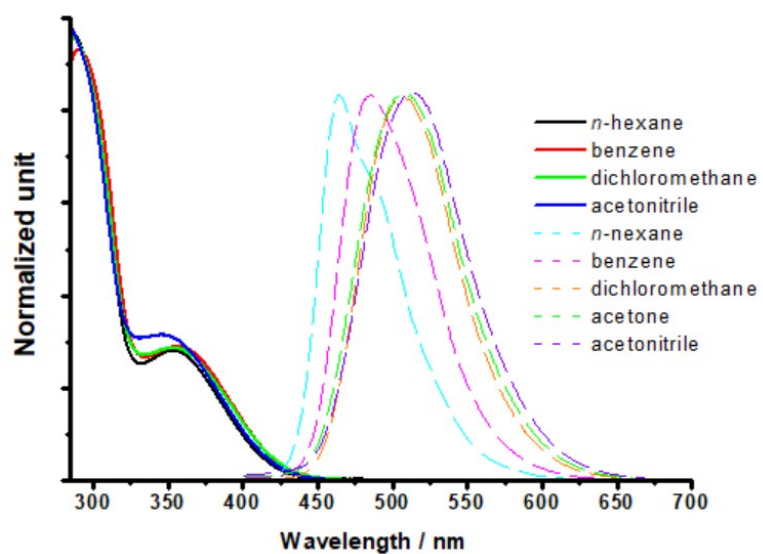

**Fig. S1** Absorption (solid lines) and emission spectra (dash lines) of **BIMP<sub>1</sub>** in different solvents

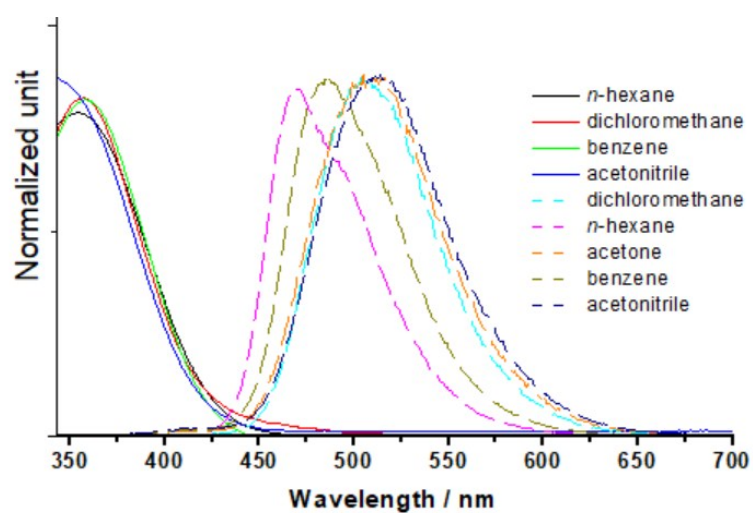

**Fig. S2** Absorption (solid lines) and emission spectra (dash lines) of **BIMP<sub>6</sub>** in different solvents

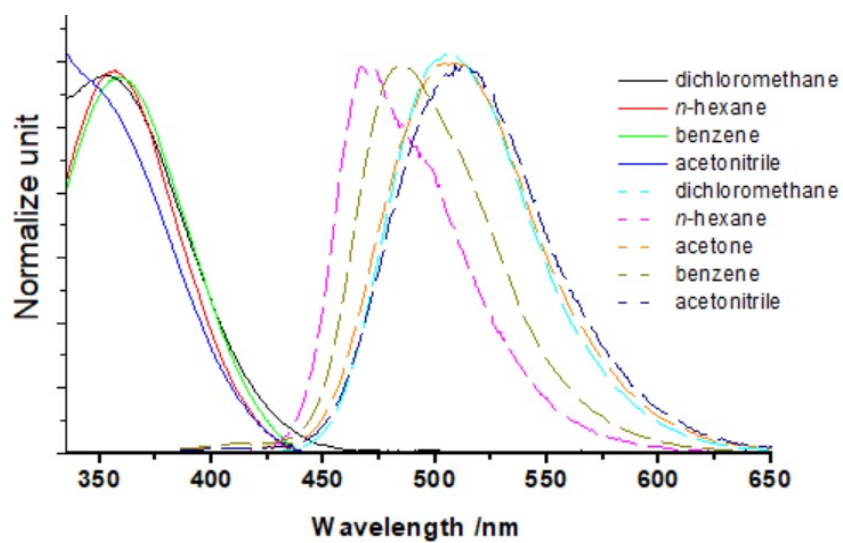

Fig. S3 Absorption (solid lines) and emission spectra (dash lines) of BIMP<sub>6t</sub> in different solvents

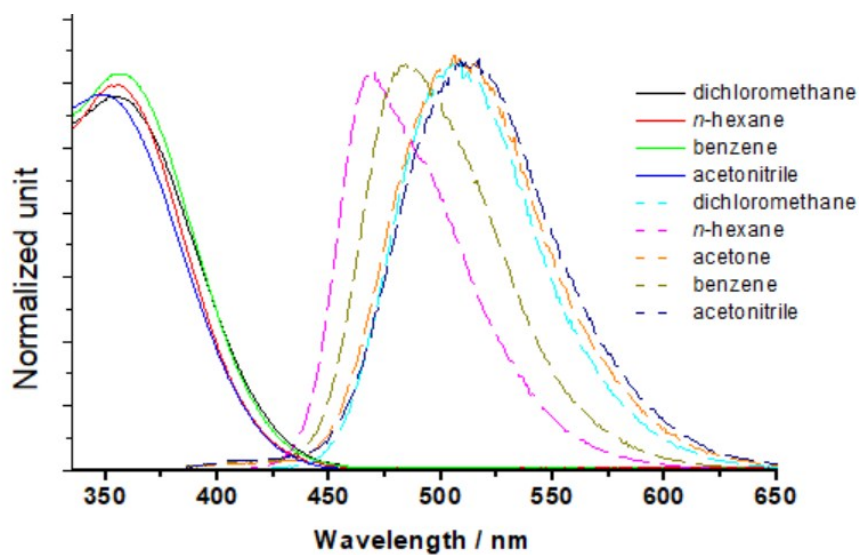

Fig. S4 Absorption (solid lines) and emission spectra (dash lines) of BIMP<sub>8</sub> in different solvents



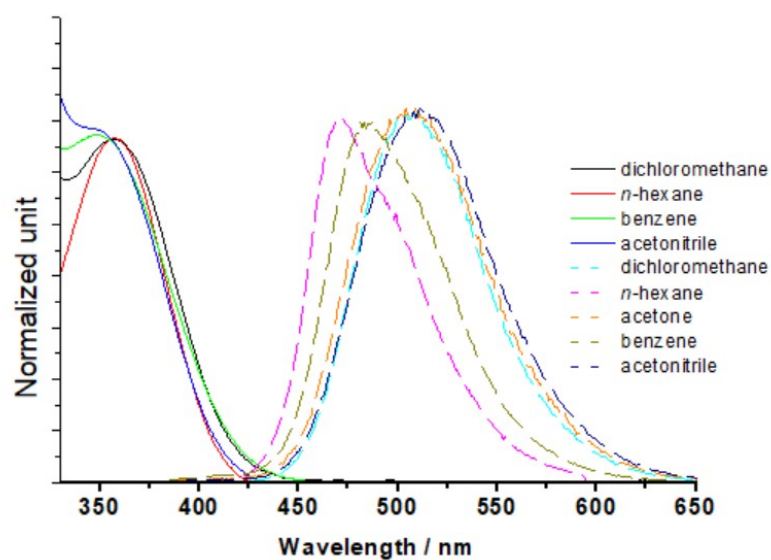

Fig. S5 Absorption (solid lines) and emission spectra (dash lines) of **BIMP<sub>Bi</sub>** in different solvents

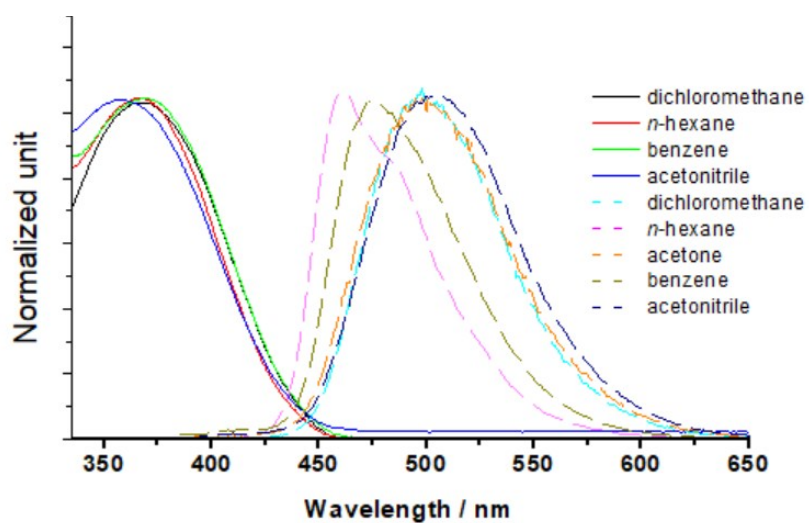

Fig. S6 Absorption (solid lines) and emission spectra (dash lines) of **BIMP<sub>BZ</sub>** in different solvents

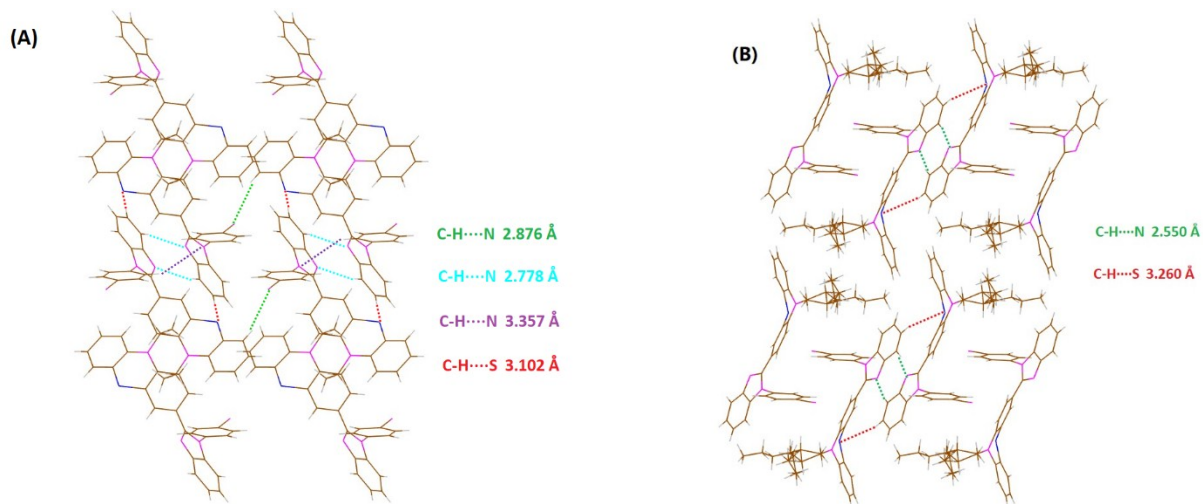

**Fig. S7** Molecular packings of **BIMP<sub>2</sub>** (A) and **BIMP<sub>8i</sub>** (B)

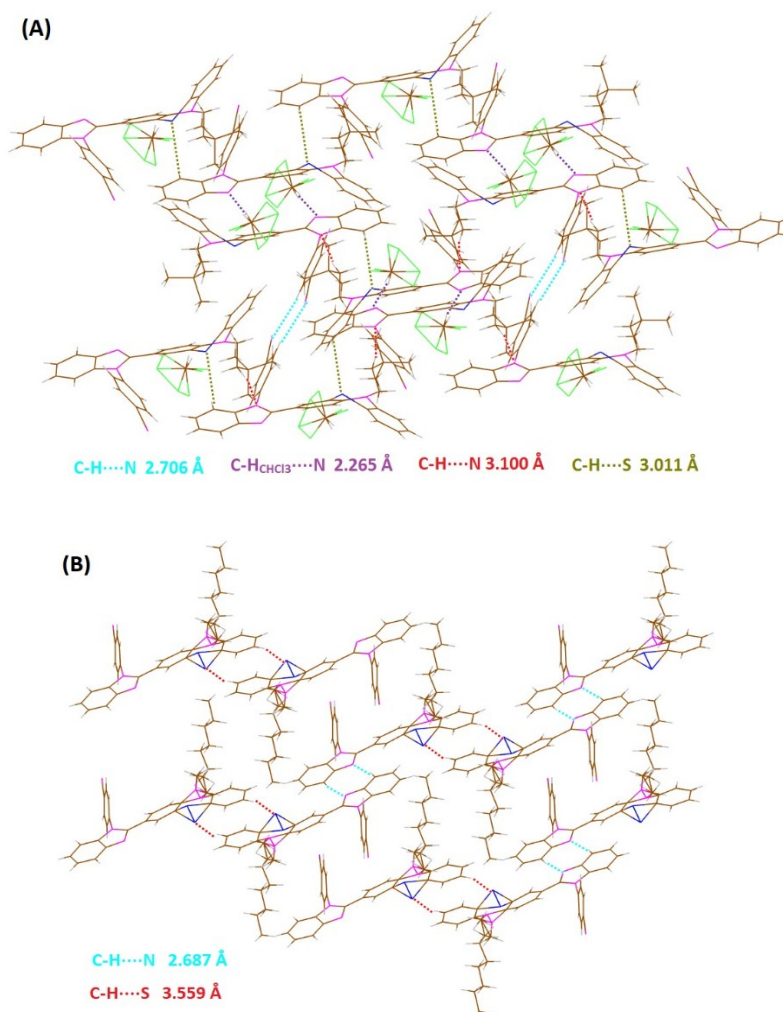

**Fig. S8** Molecular packings of **BIMP<sub>6t</sub>** (A) and **BIMP<sub>8</sub>** (B)

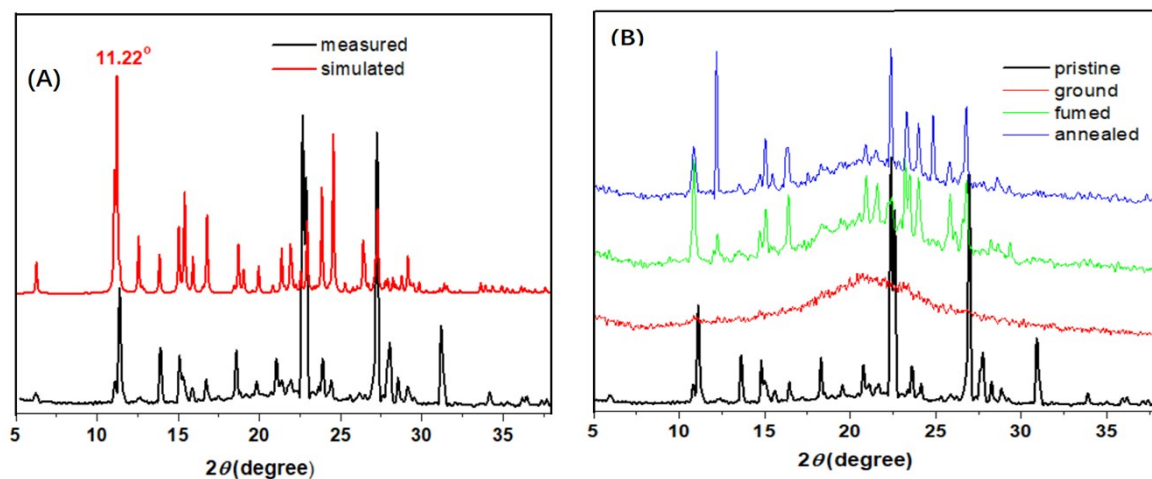

Fig. S9 PXRD patterns of **BIMP<sub>1</sub>** under measured and simulated conditions (A) and other conditions (B)

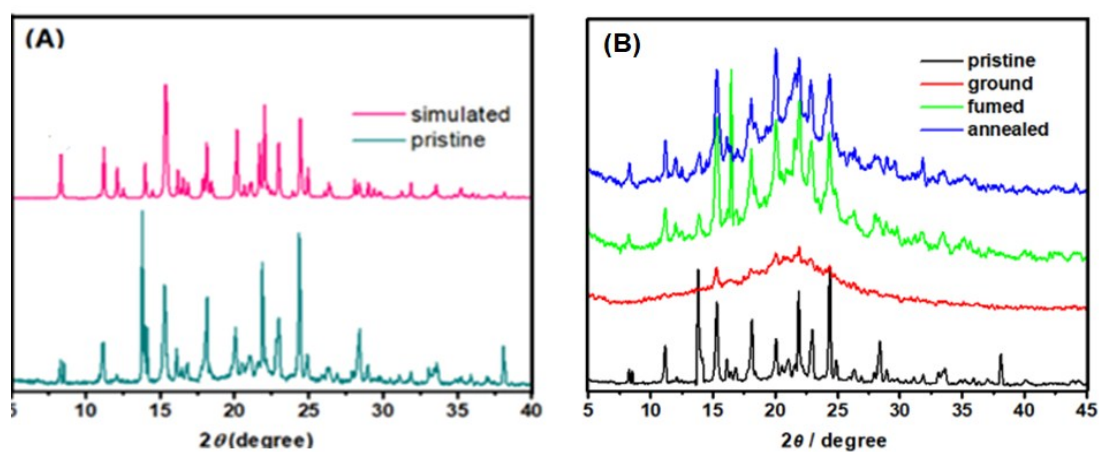

Fig. S10 PXRD patterns of **BIMP<sub>2</sub>** under measured and simulated conditions (A) and other conditions (B)

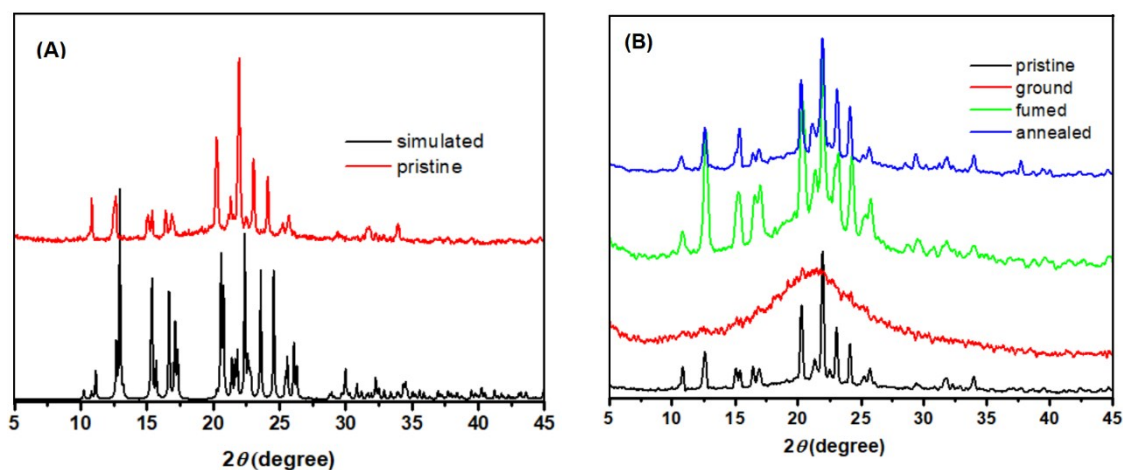

Fig. S11 PXRD patterns of **BIMP<sub>6</sub>** under measured and simulated conditions (A) and other conditions (B)

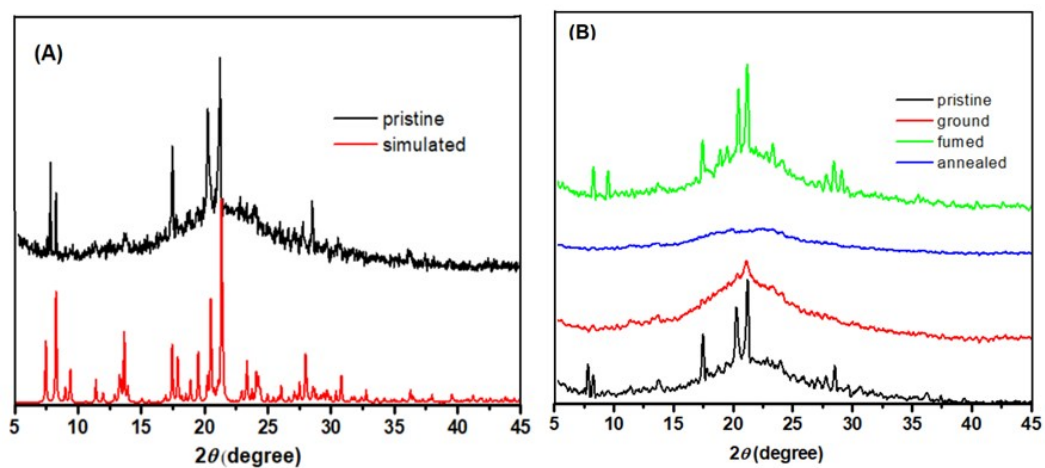

Fig. S12 PXRD patterns of **BIMP<sub>6t</sub>** under measured and simulated conditions (A) and other conditions (B)

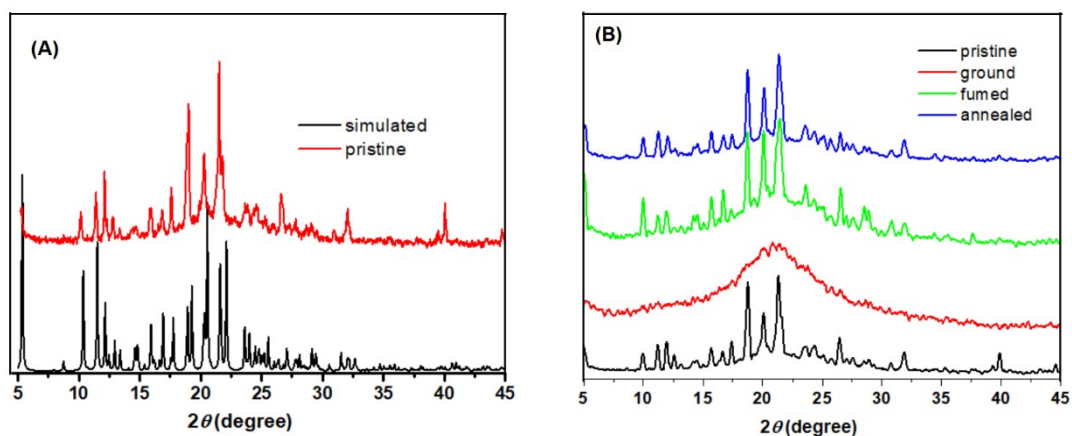

Fig. S13 PXRD patterns of **BIMP<sub>8t</sub>** under measured and simulated conditions (A) and other conditions (B)

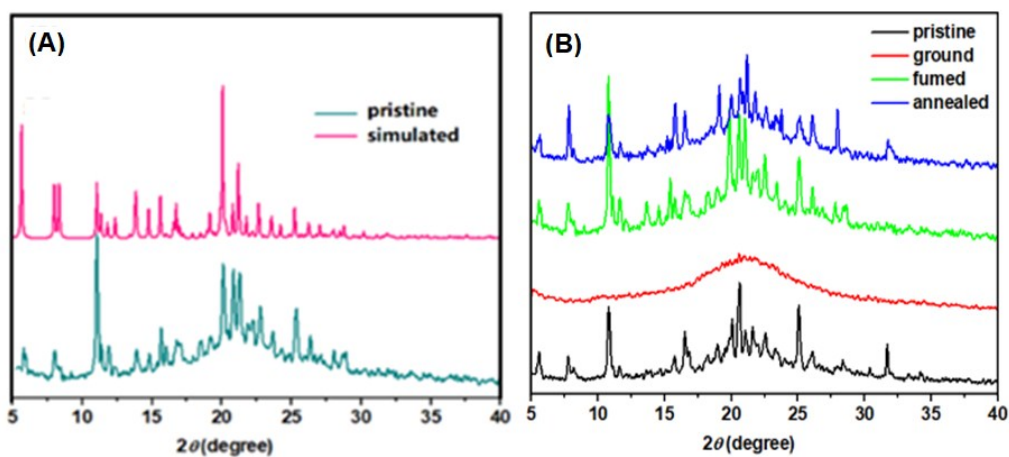

Fig. S14 PXRD patterns of **BIMP<sub>8</sub>** under measured and simulated conditions (A) and other conditions (B)

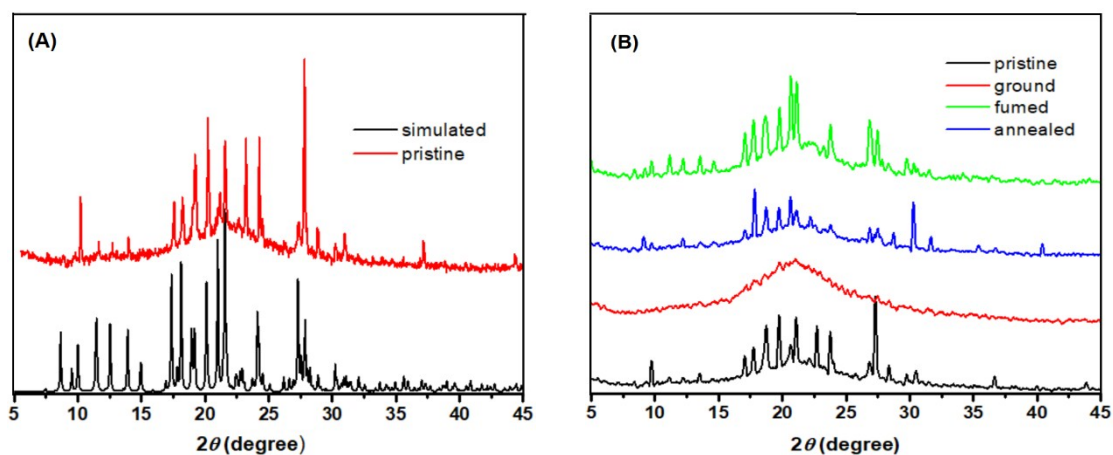

Fig. S15 PXRD patterns of **BIMP<sub>BZ</sub>** under measured and simulated conditions (A) and other conditions (B)

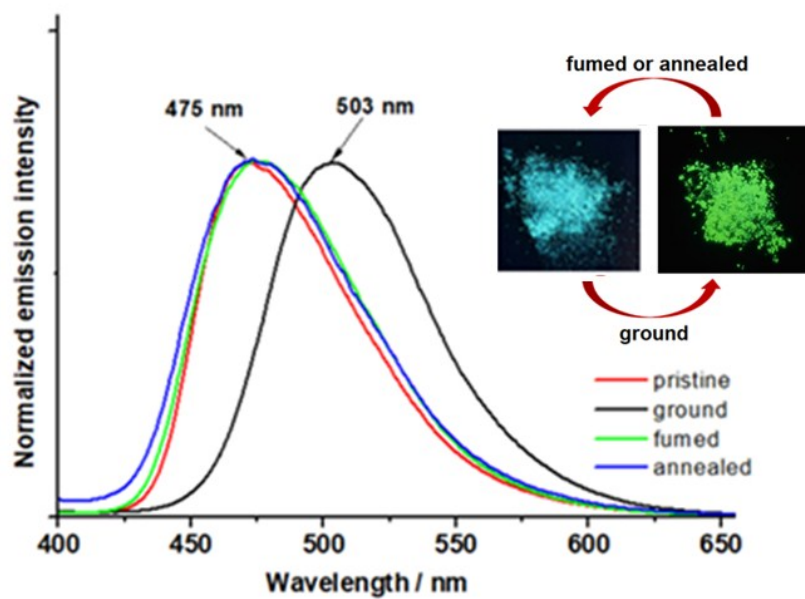

Fig. S16 Solid-state emission spectra of **BIMP<sub>1</sub>** under different conditions (inserted: photos taken under 365 nm UV irradiation)

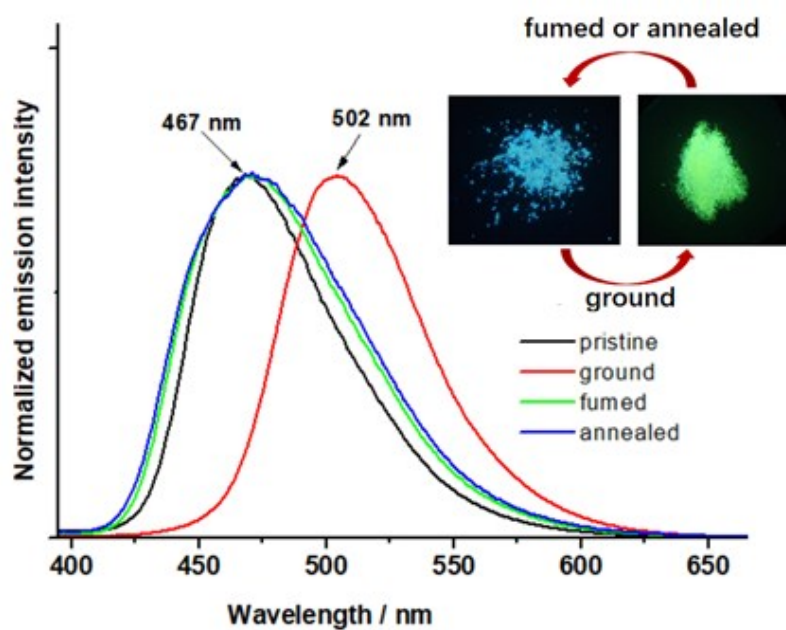

**Fig. S17** Solid-state emission spectra of  $\text{BIMP}_6$  under different conditions (inserted: photos taken under 365 nm UV irradiation)

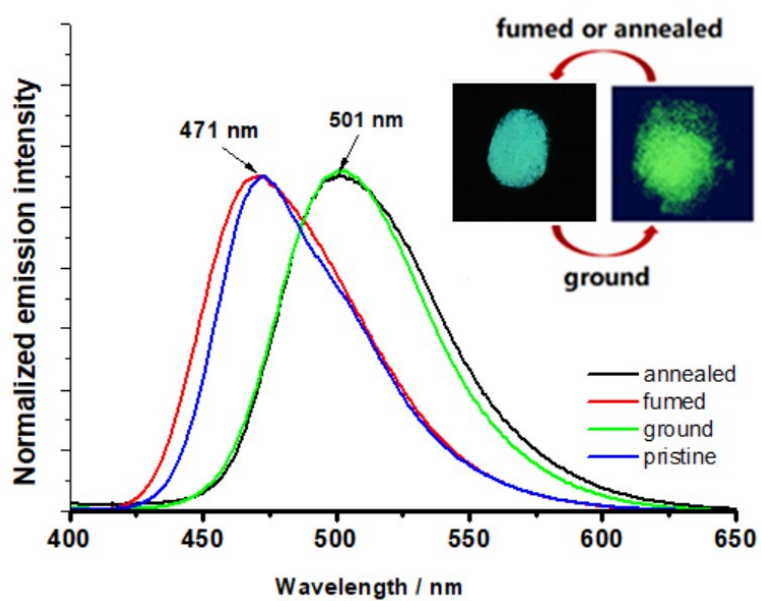

**Fig. S18** Solid-state emission spectra of  $\text{BIMP}_{6t}$  under different conditions (inserted: photos taken under 365 nm UV irradiation)

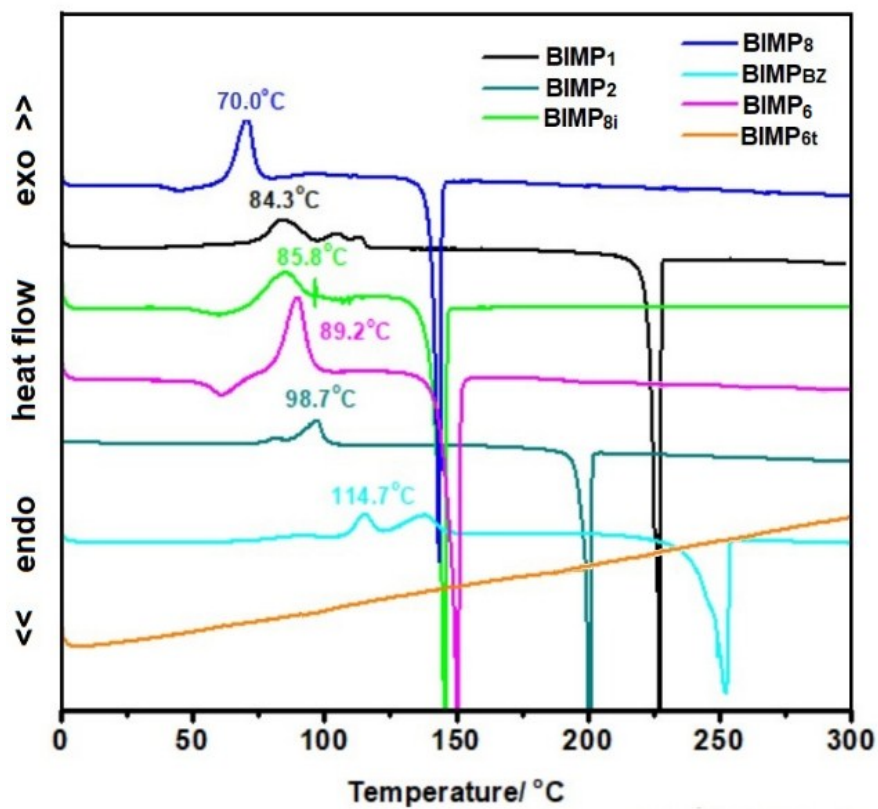

Fig. S19 DSC curves of the ground BIMP samples

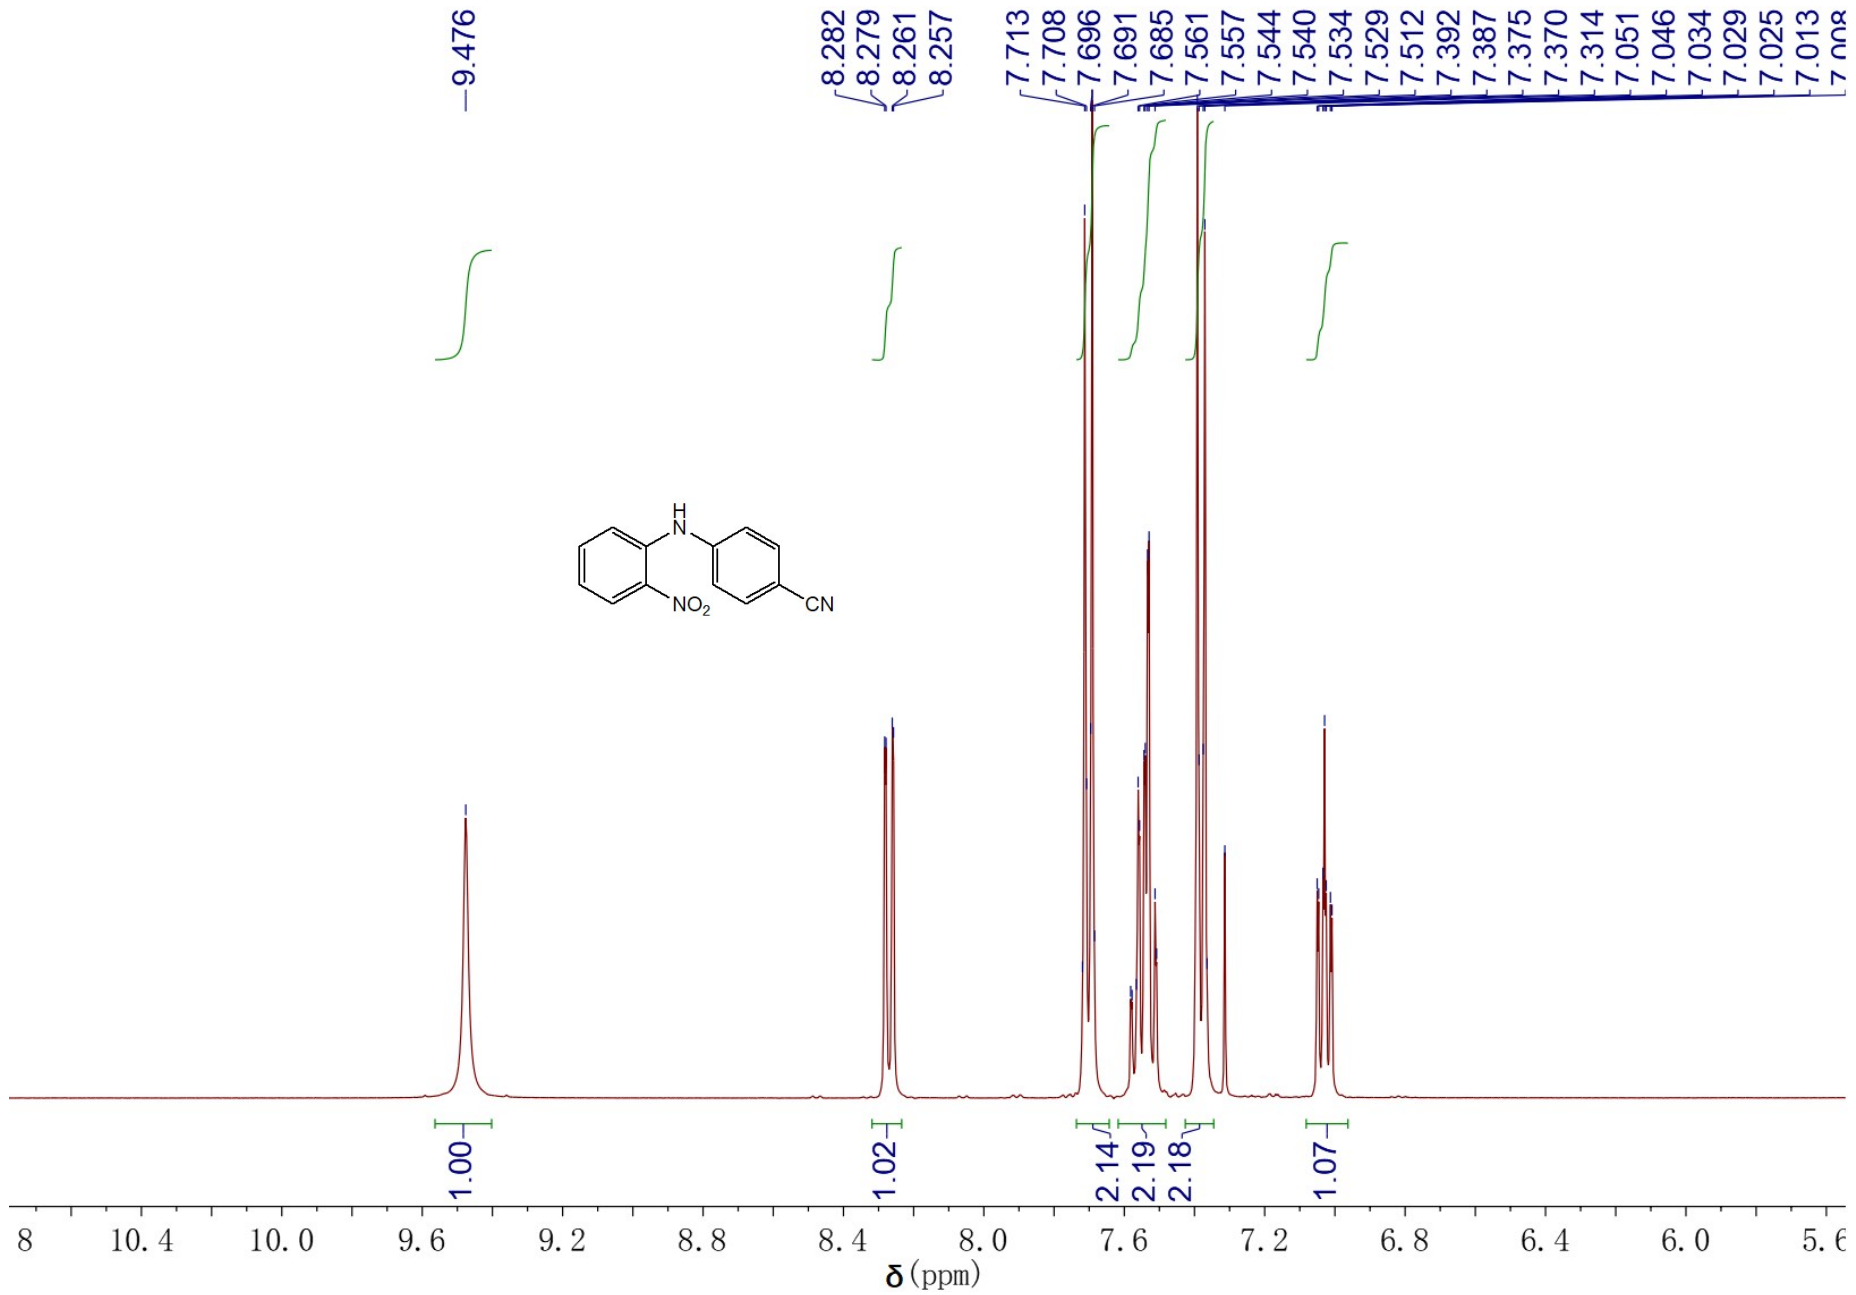



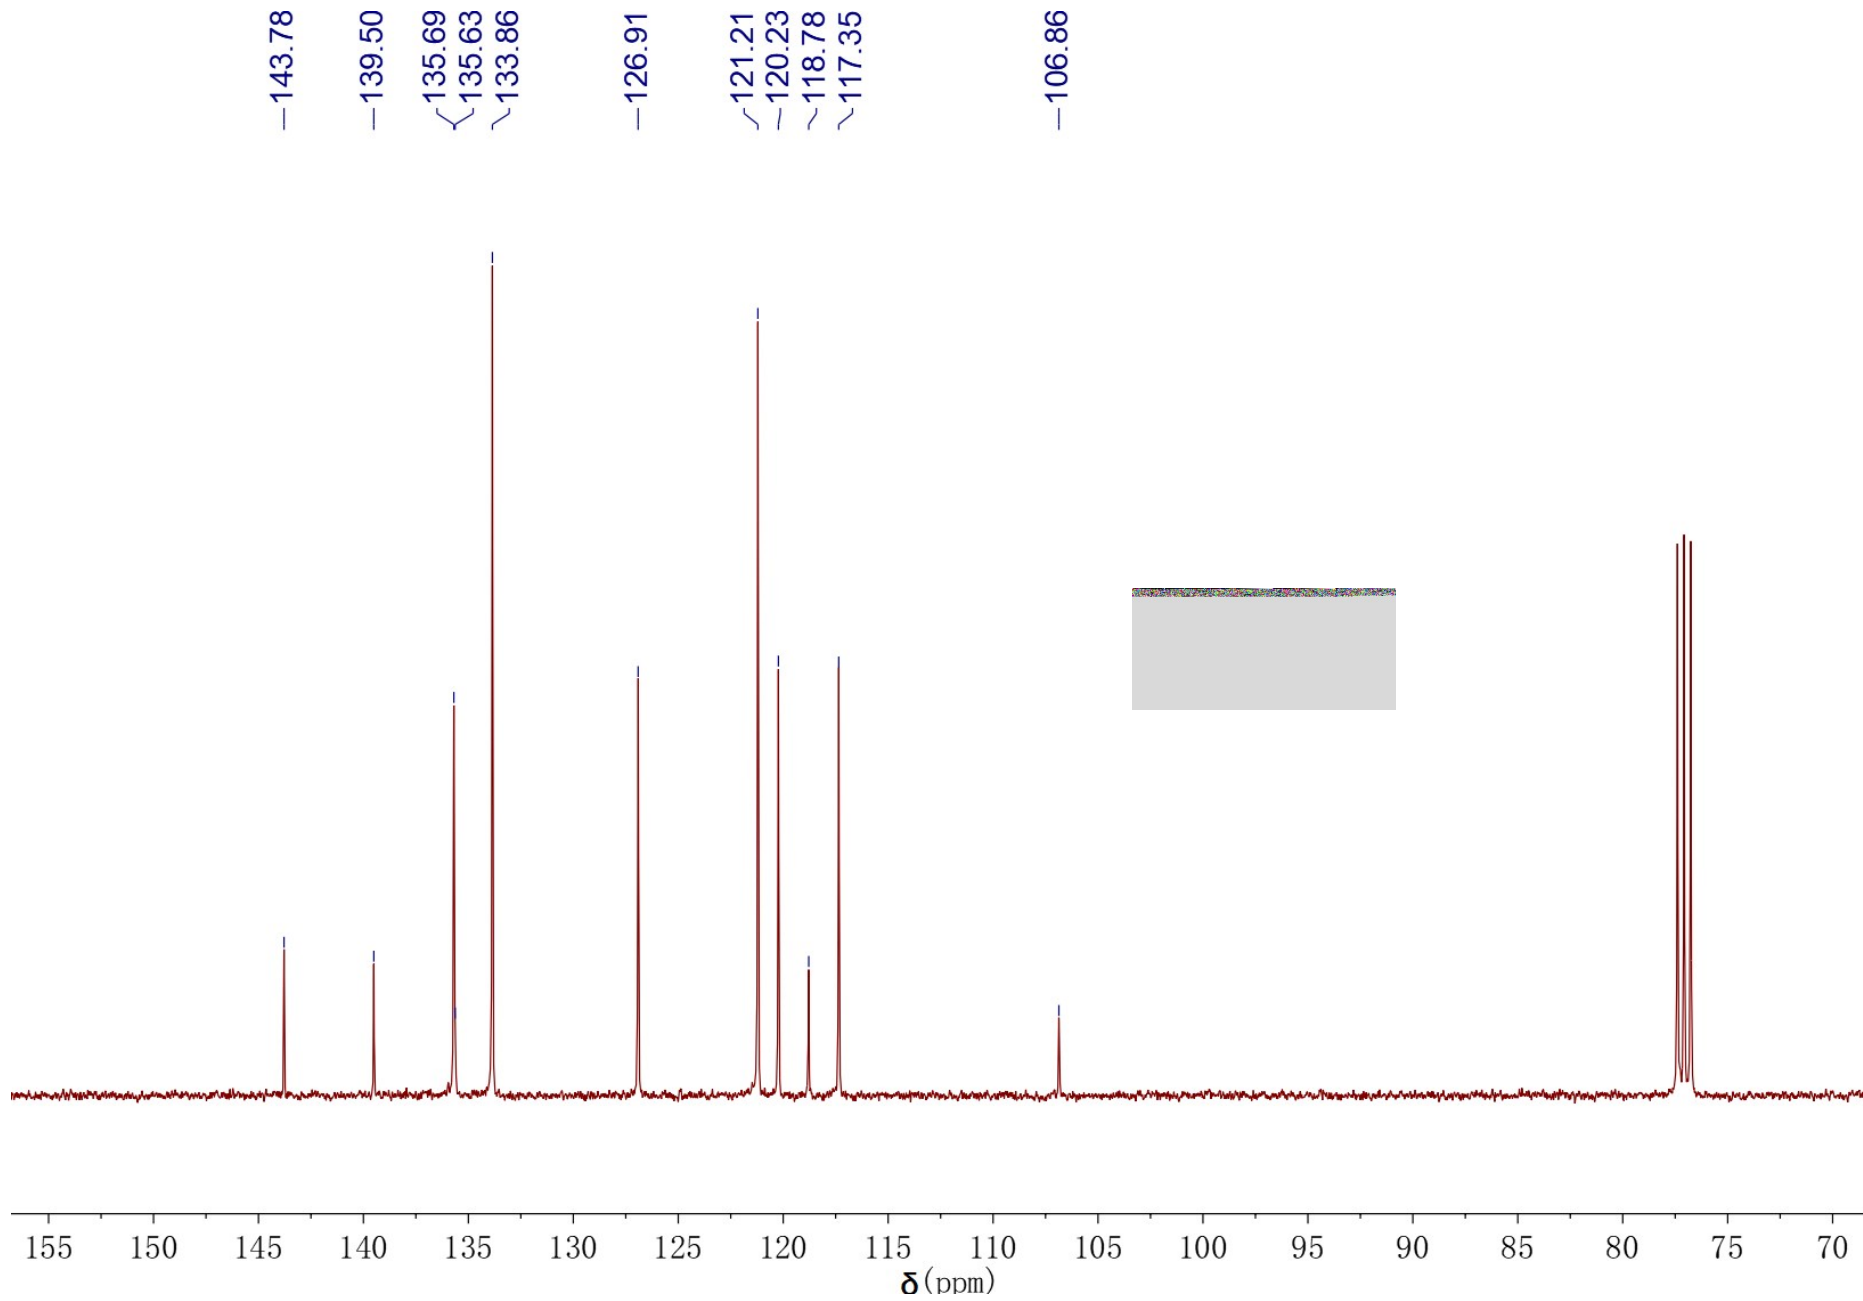

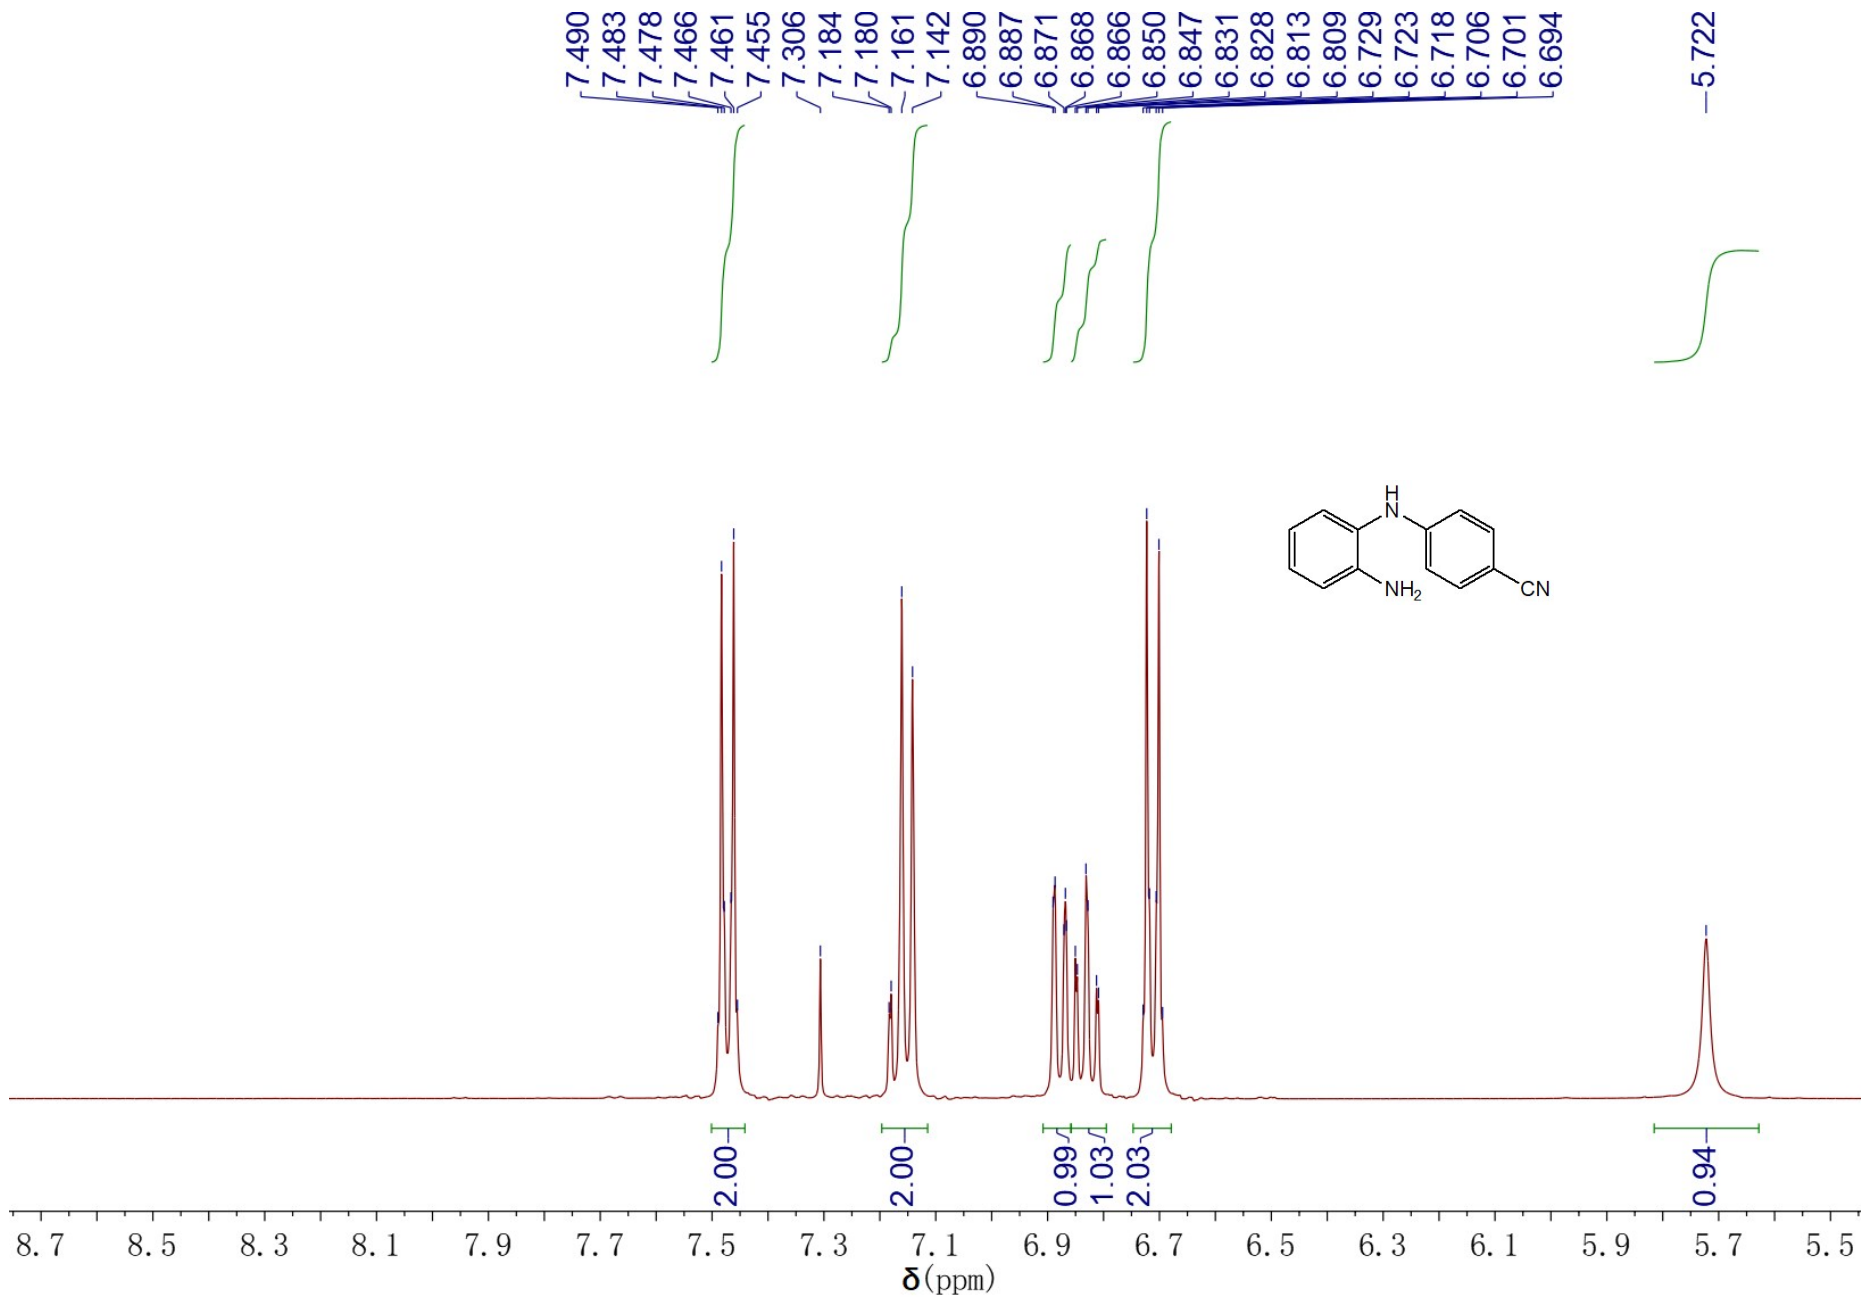

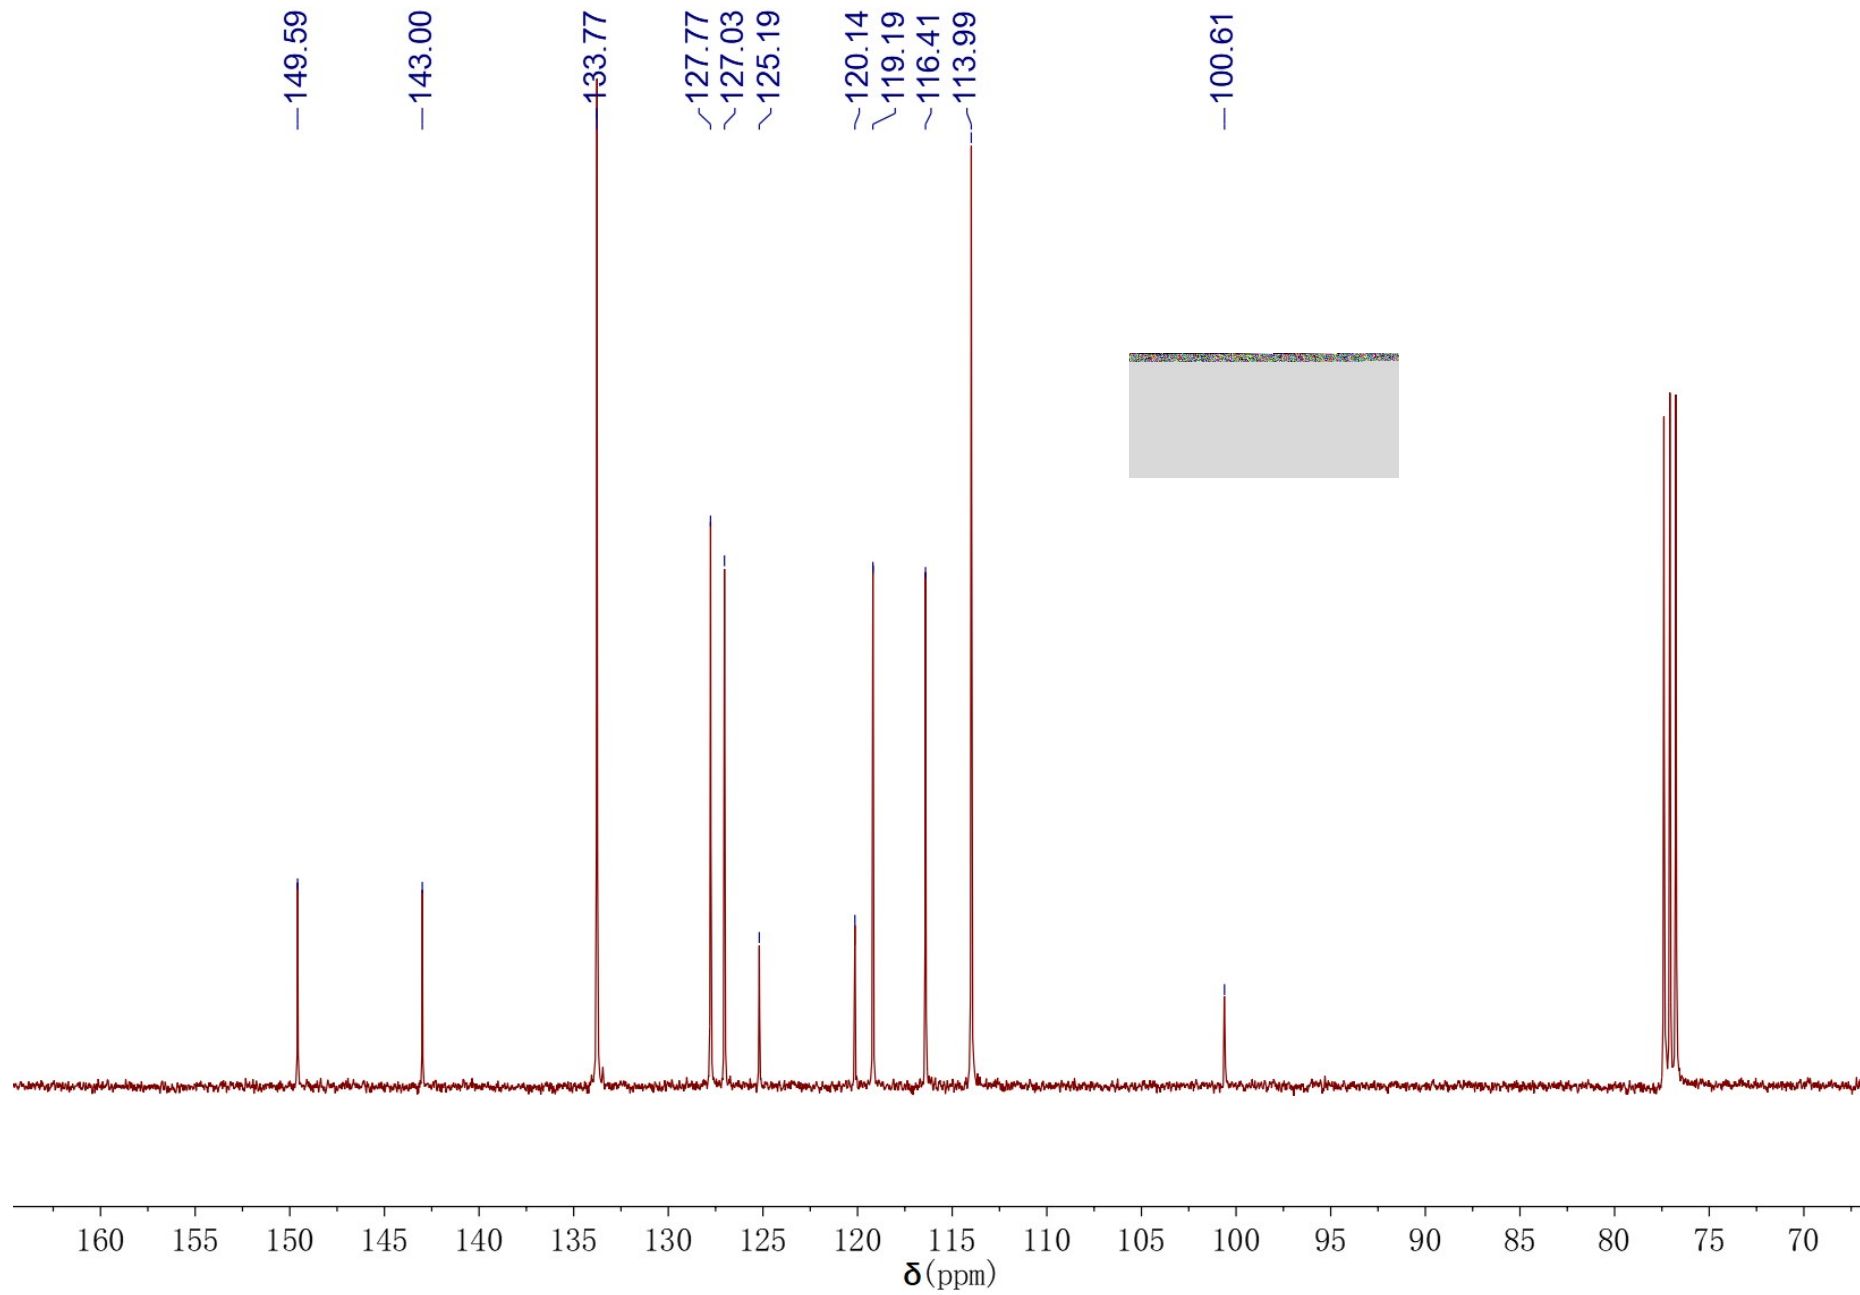

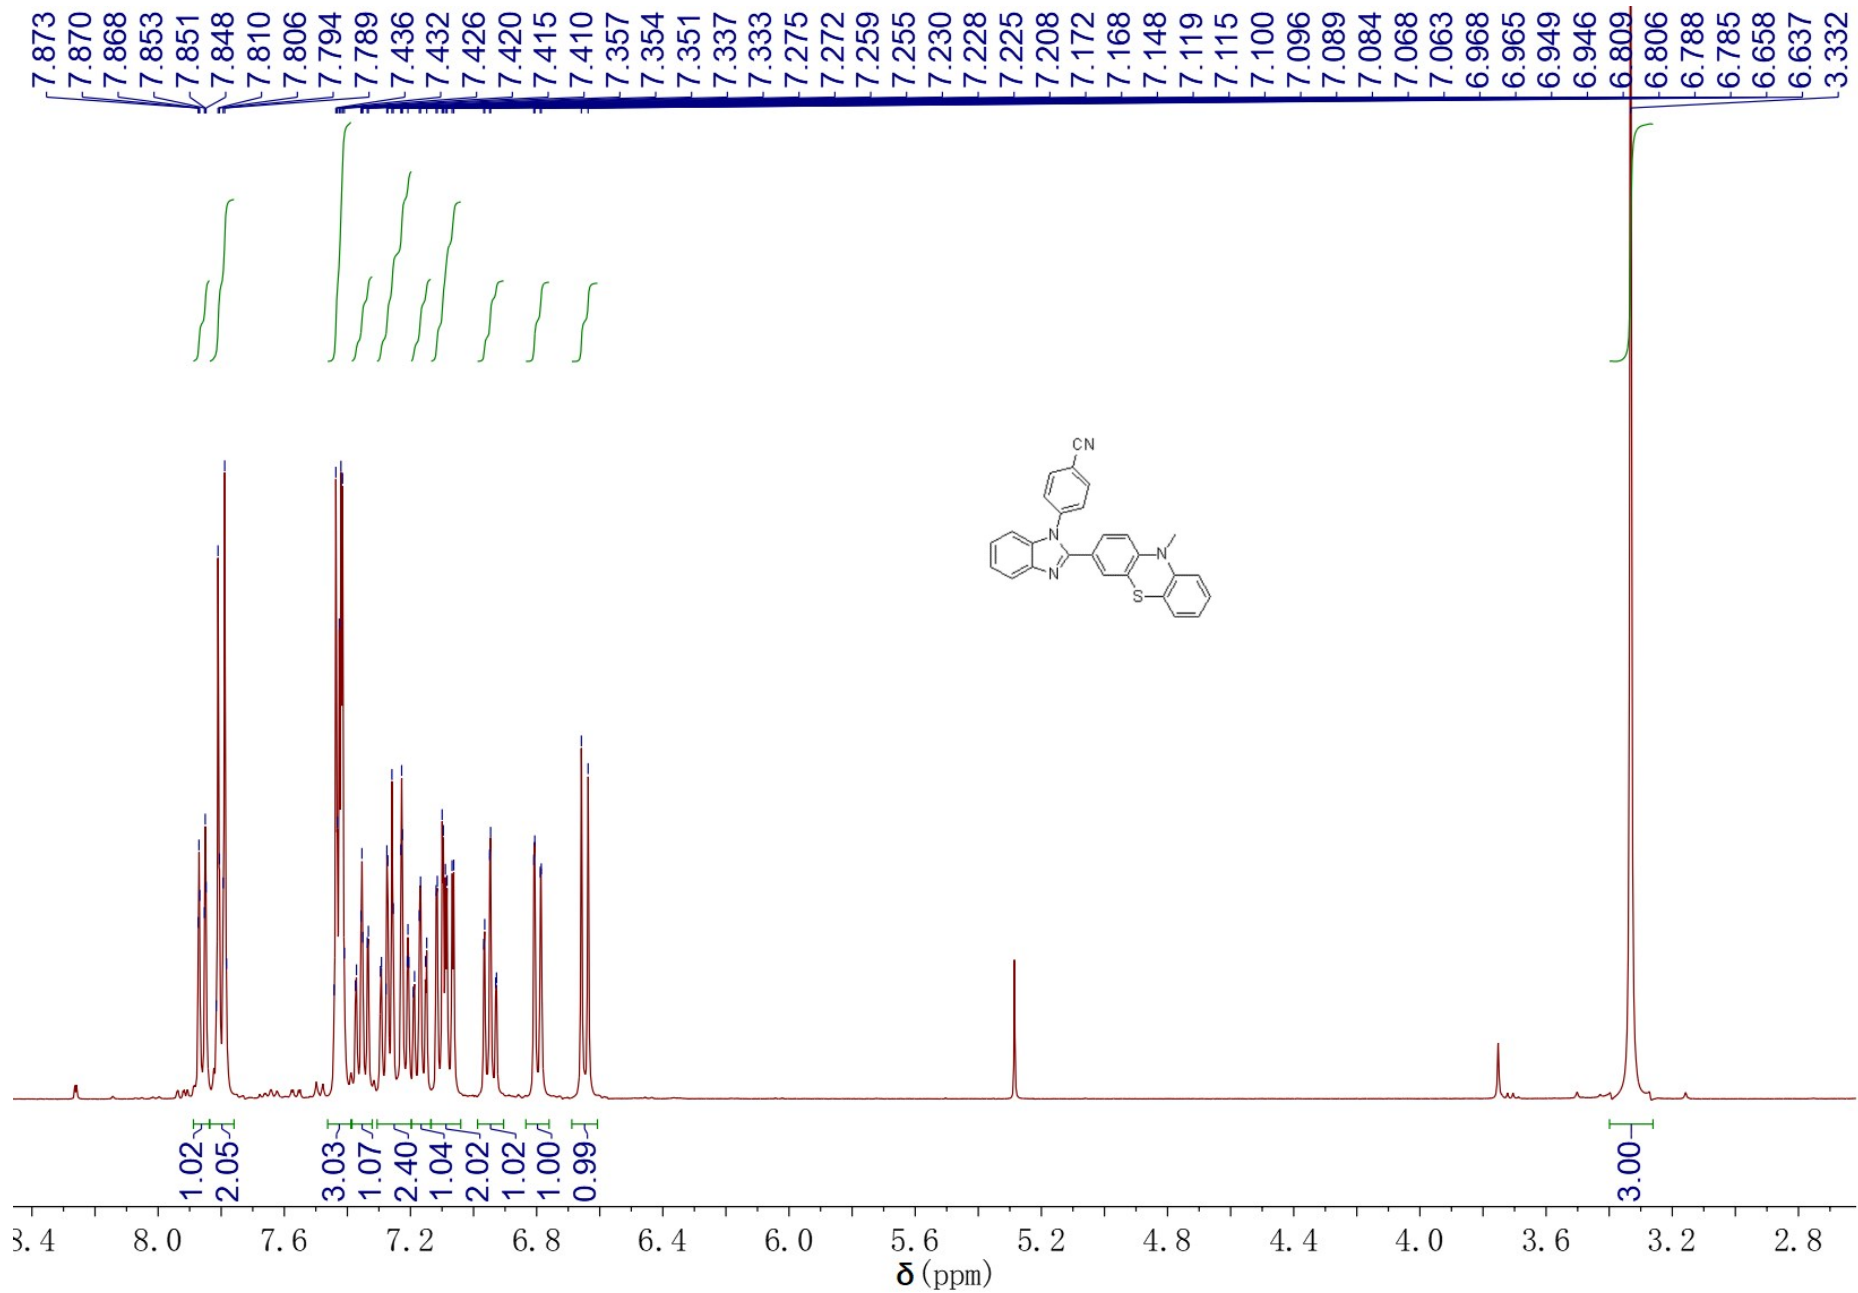

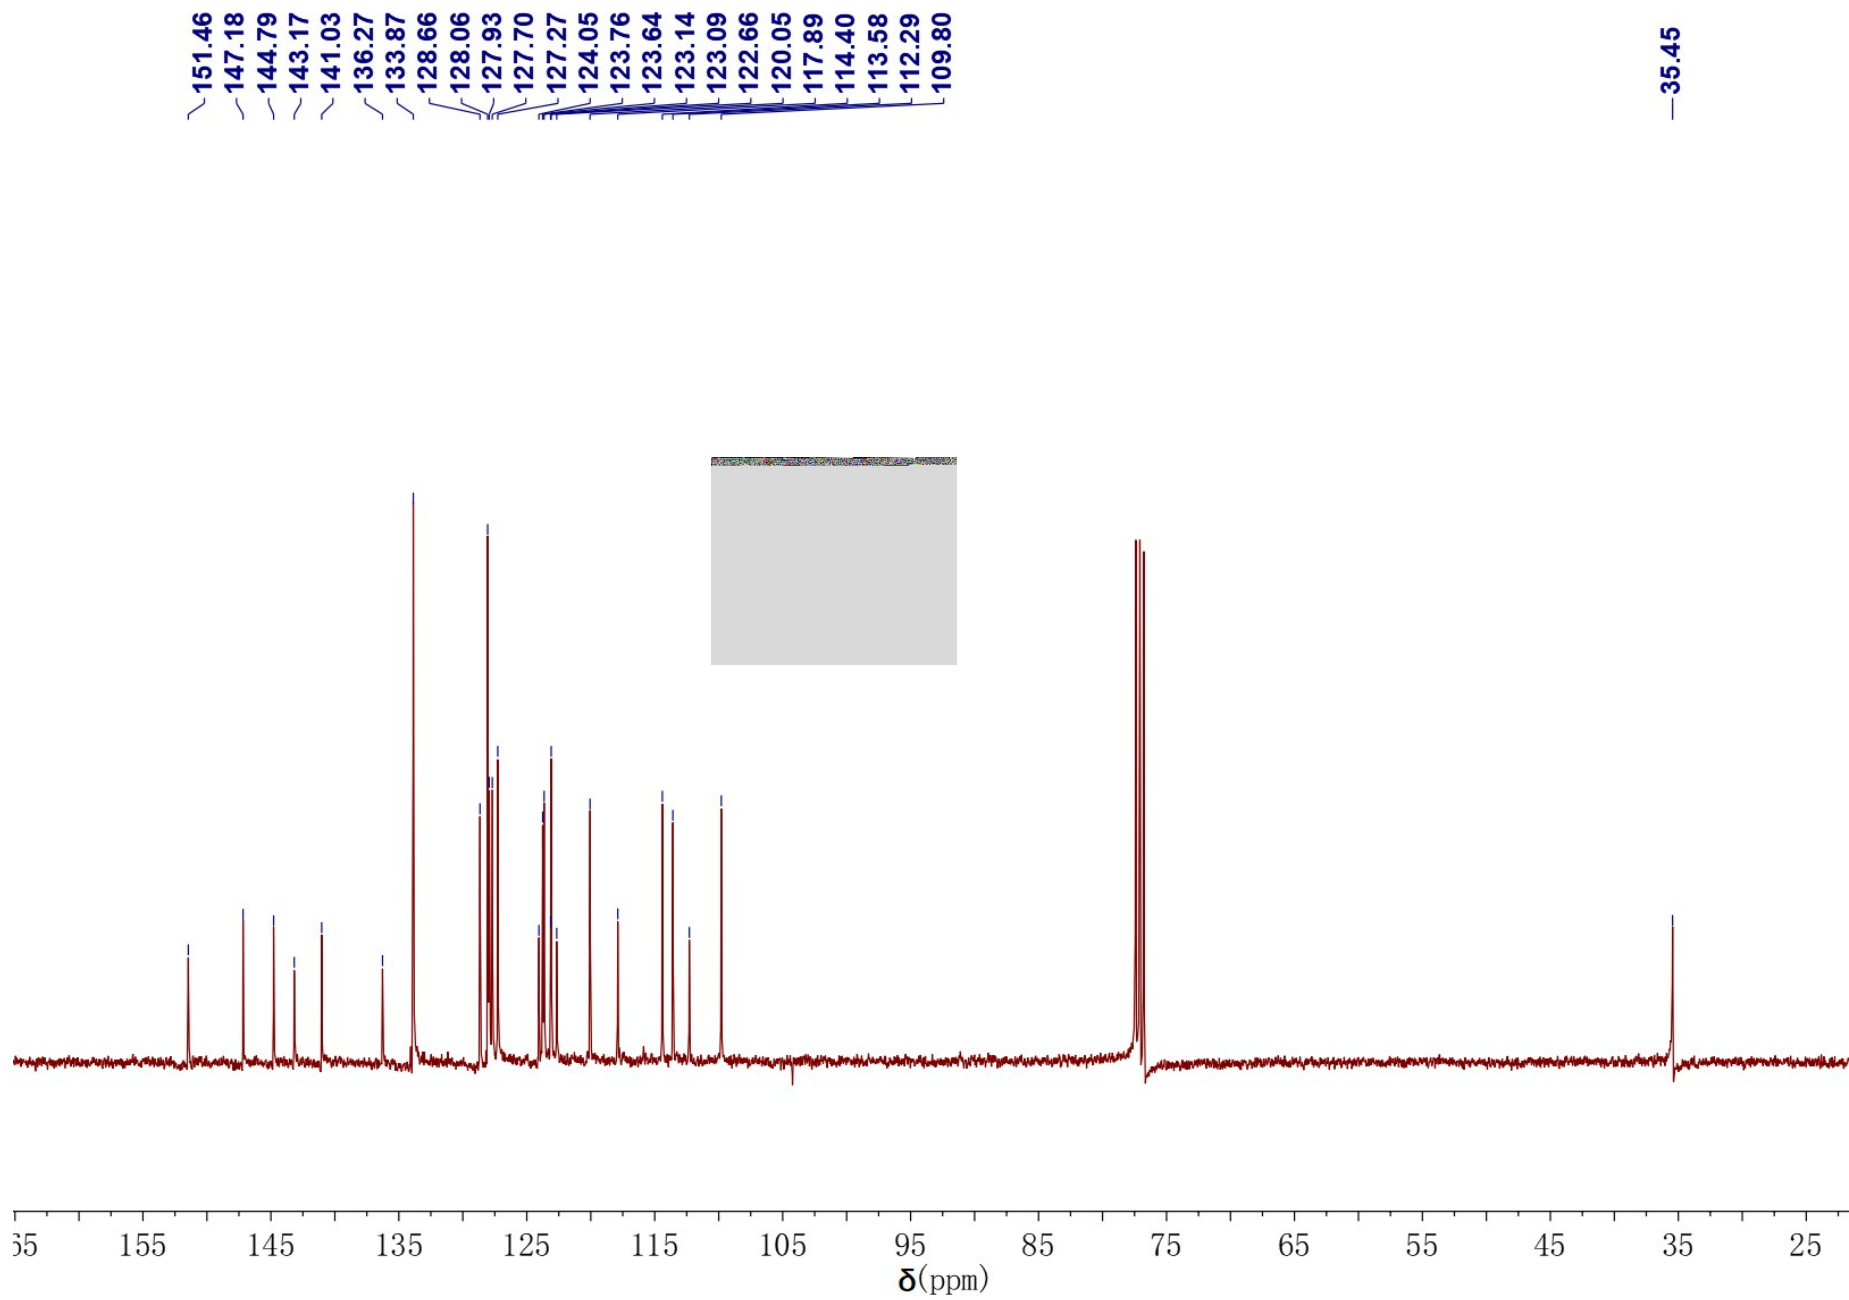

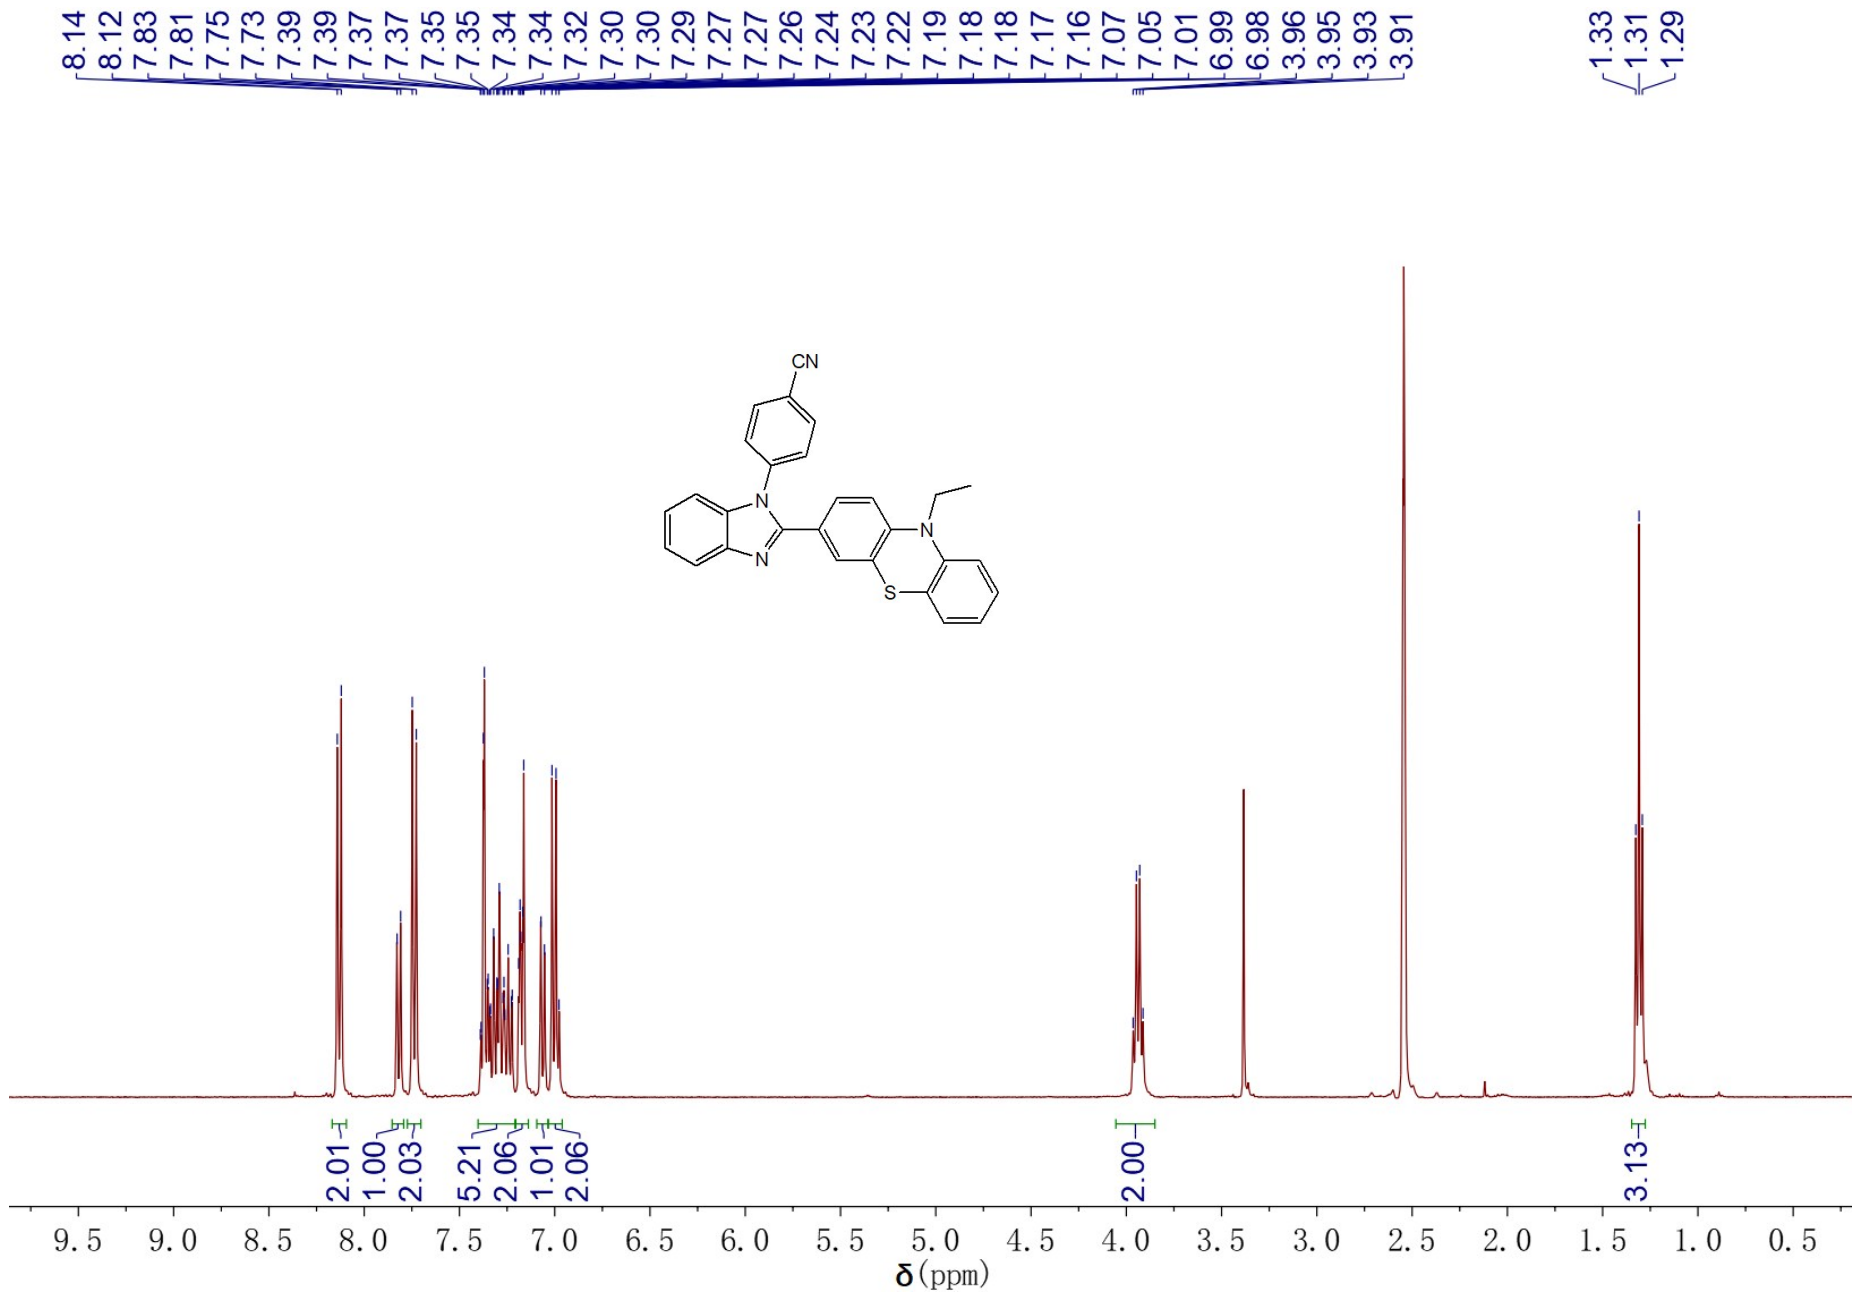

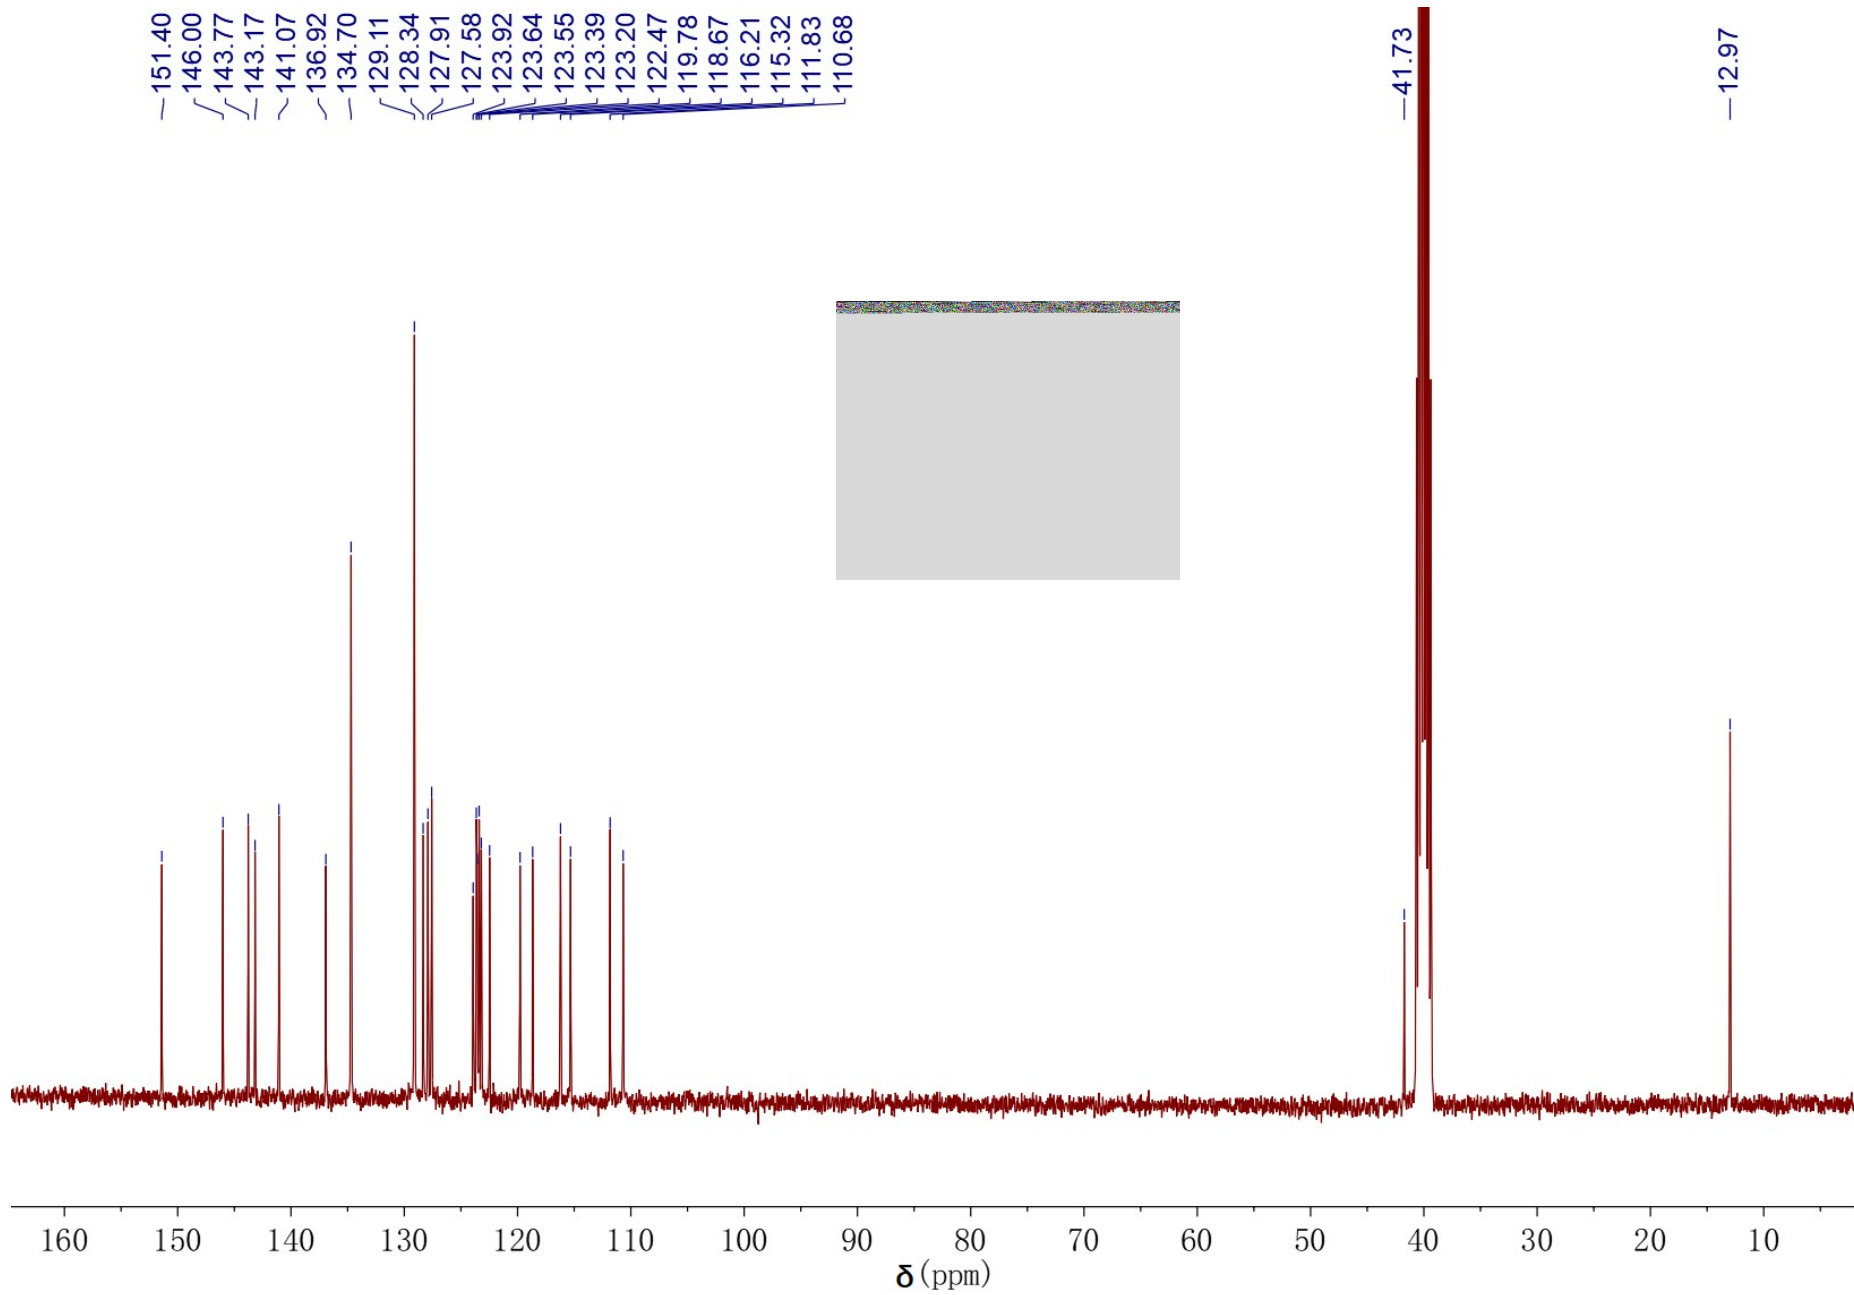

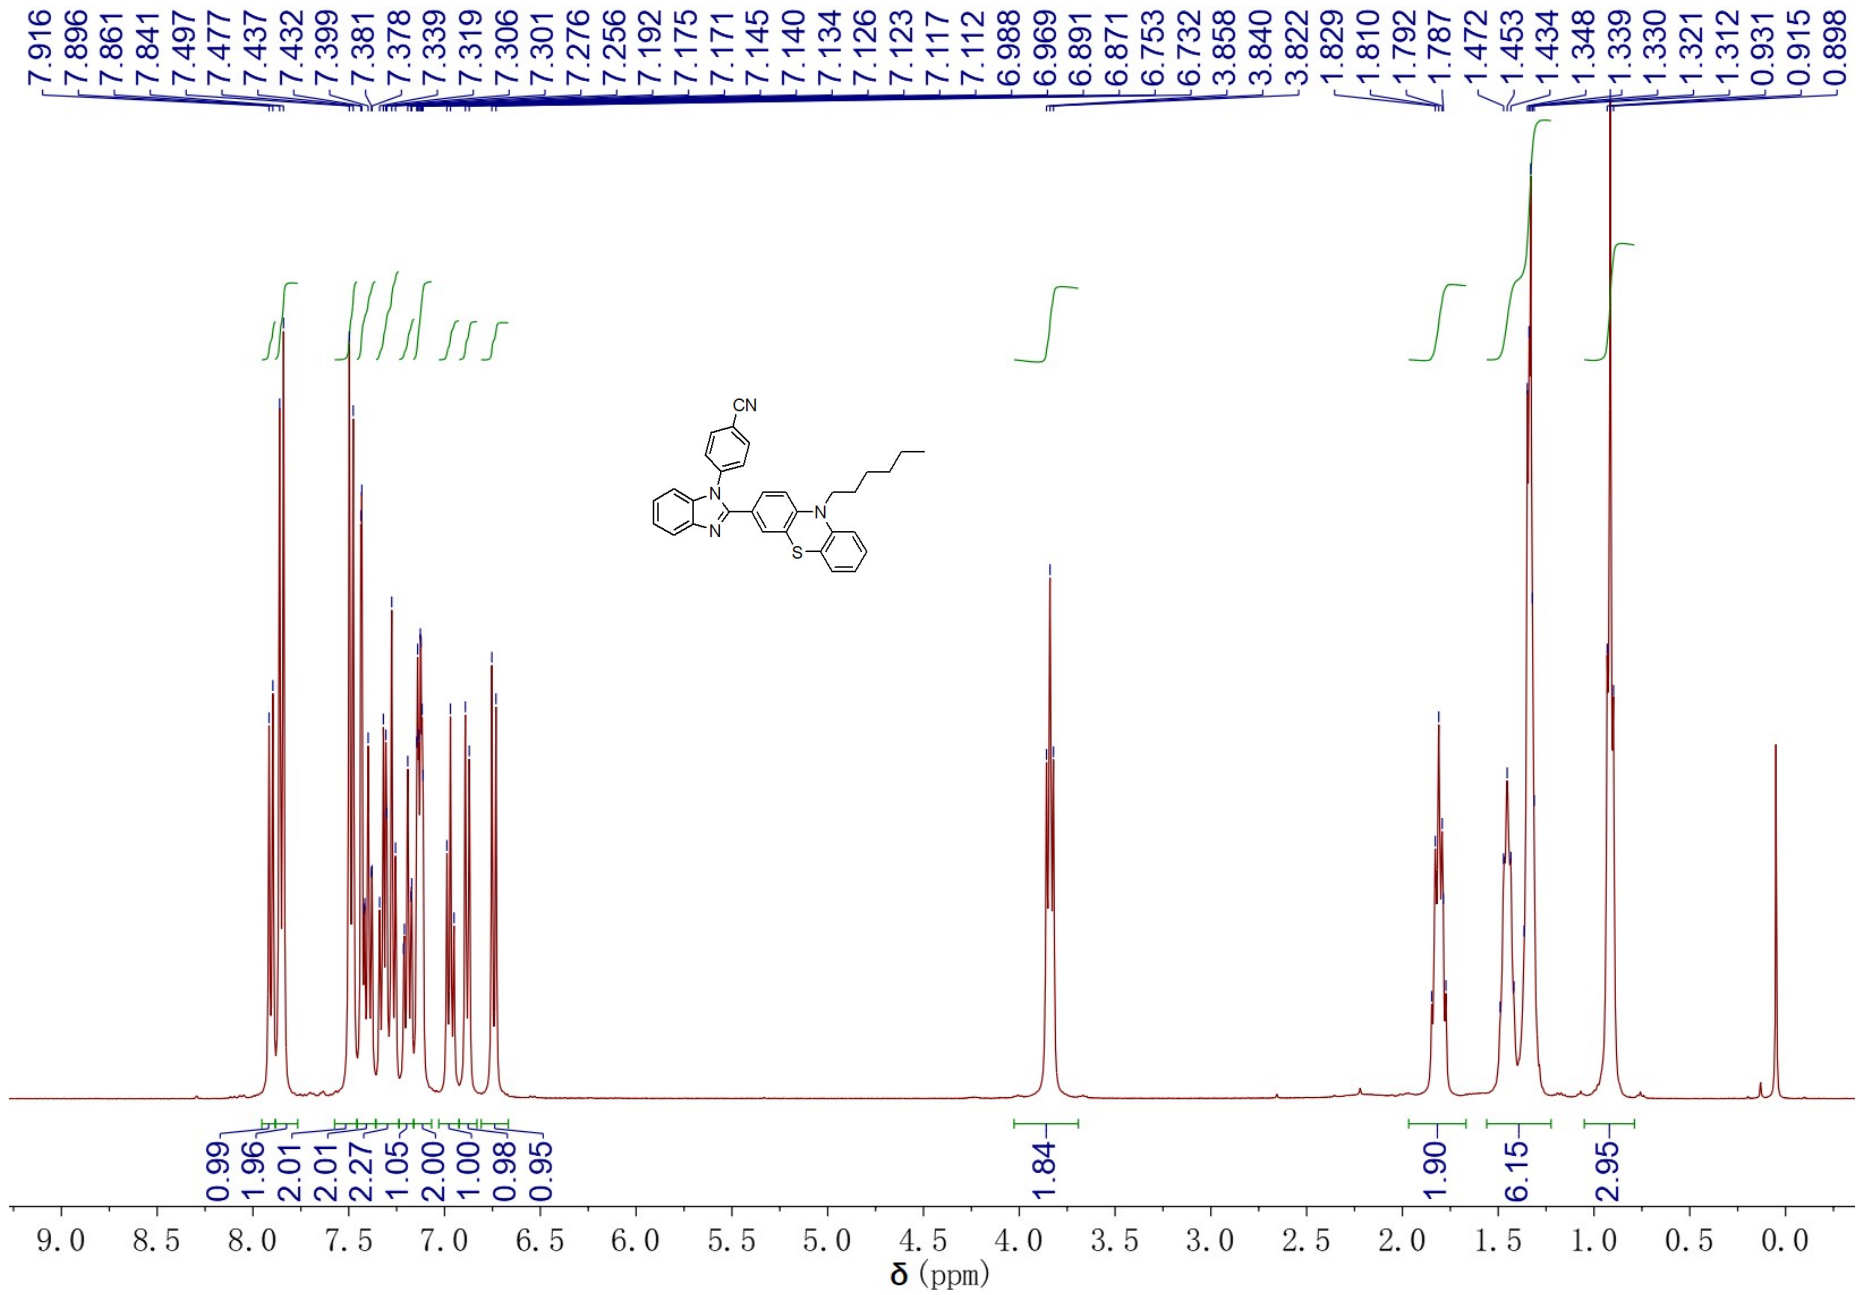



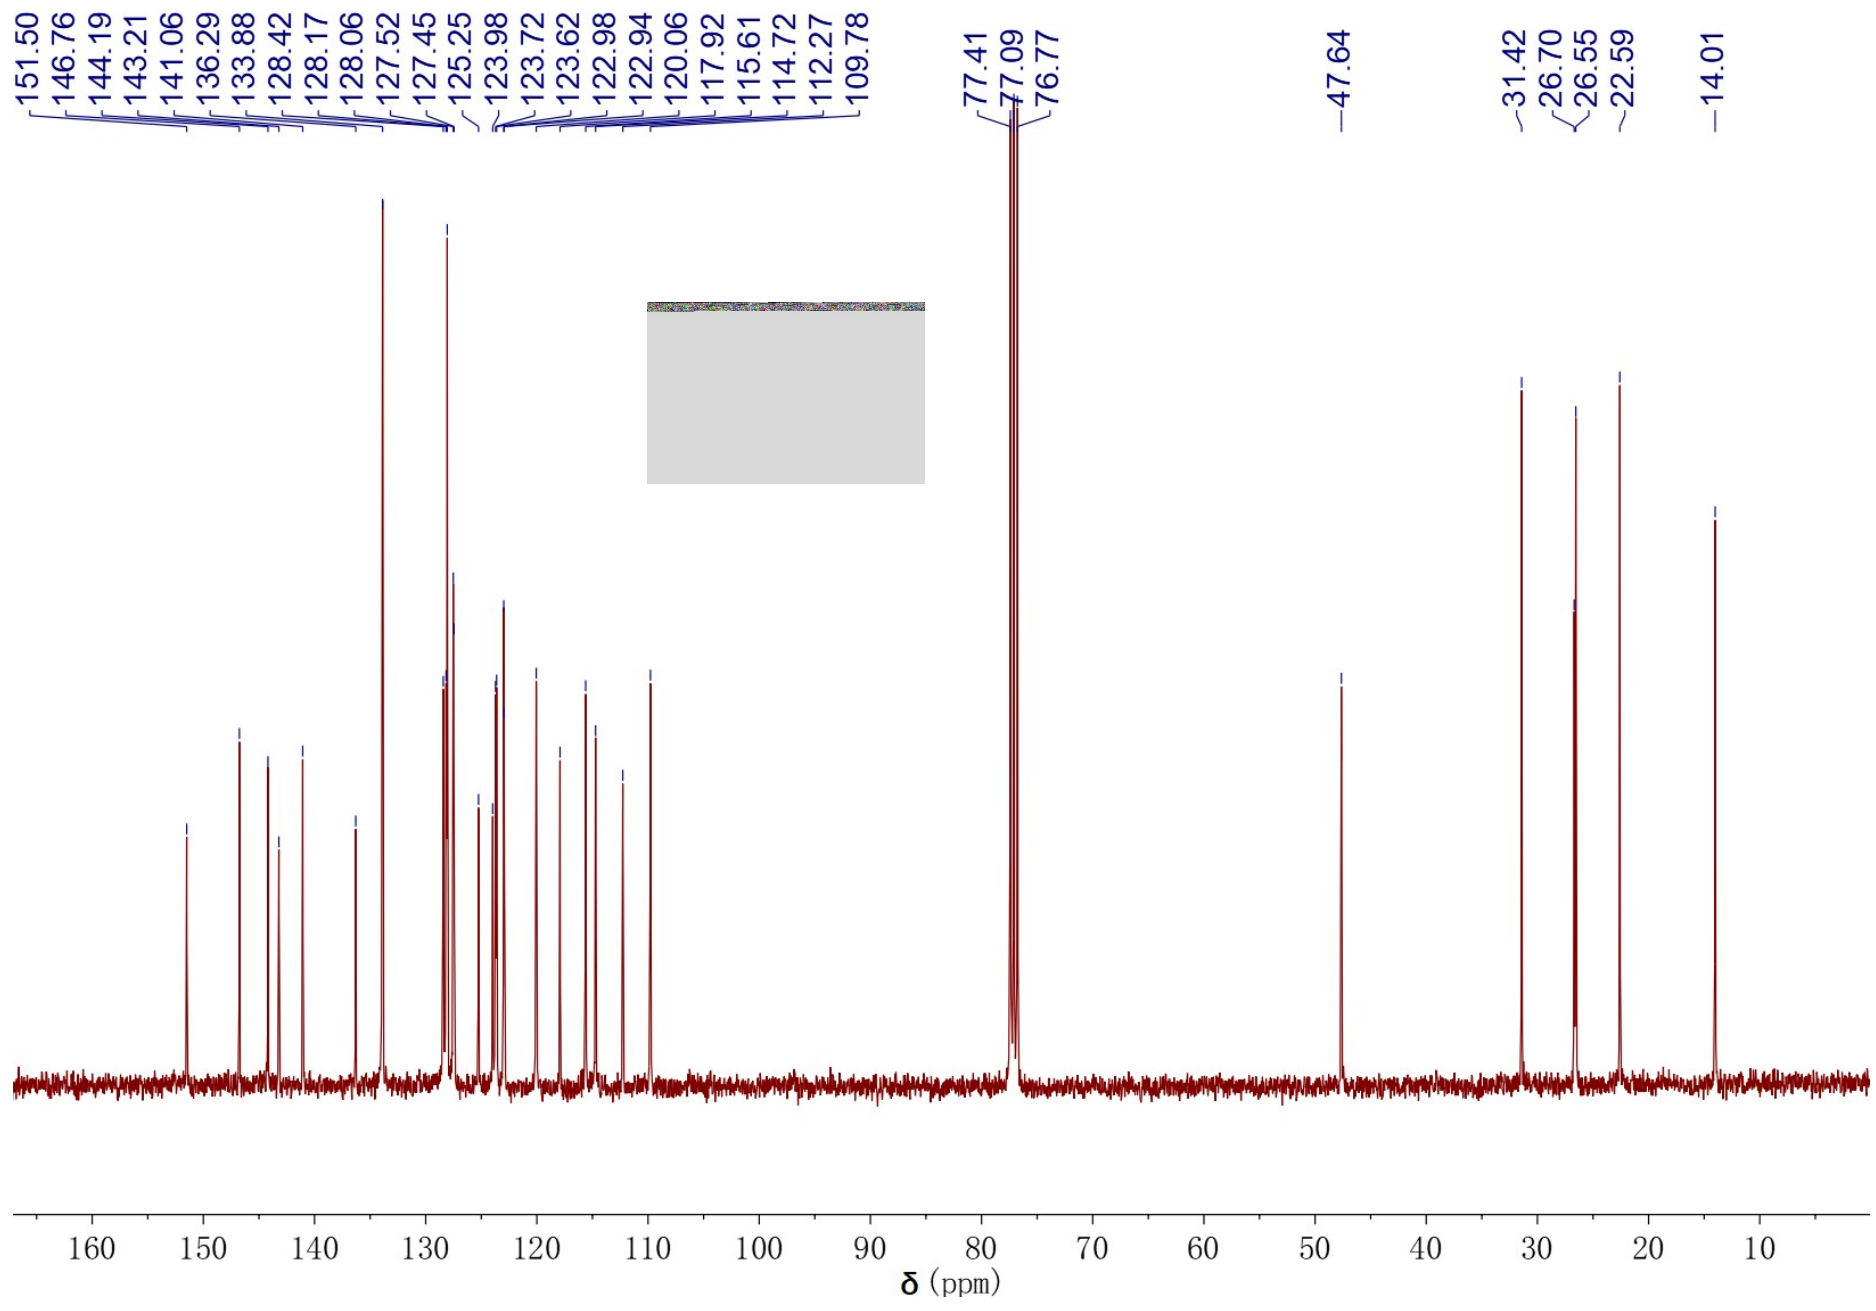

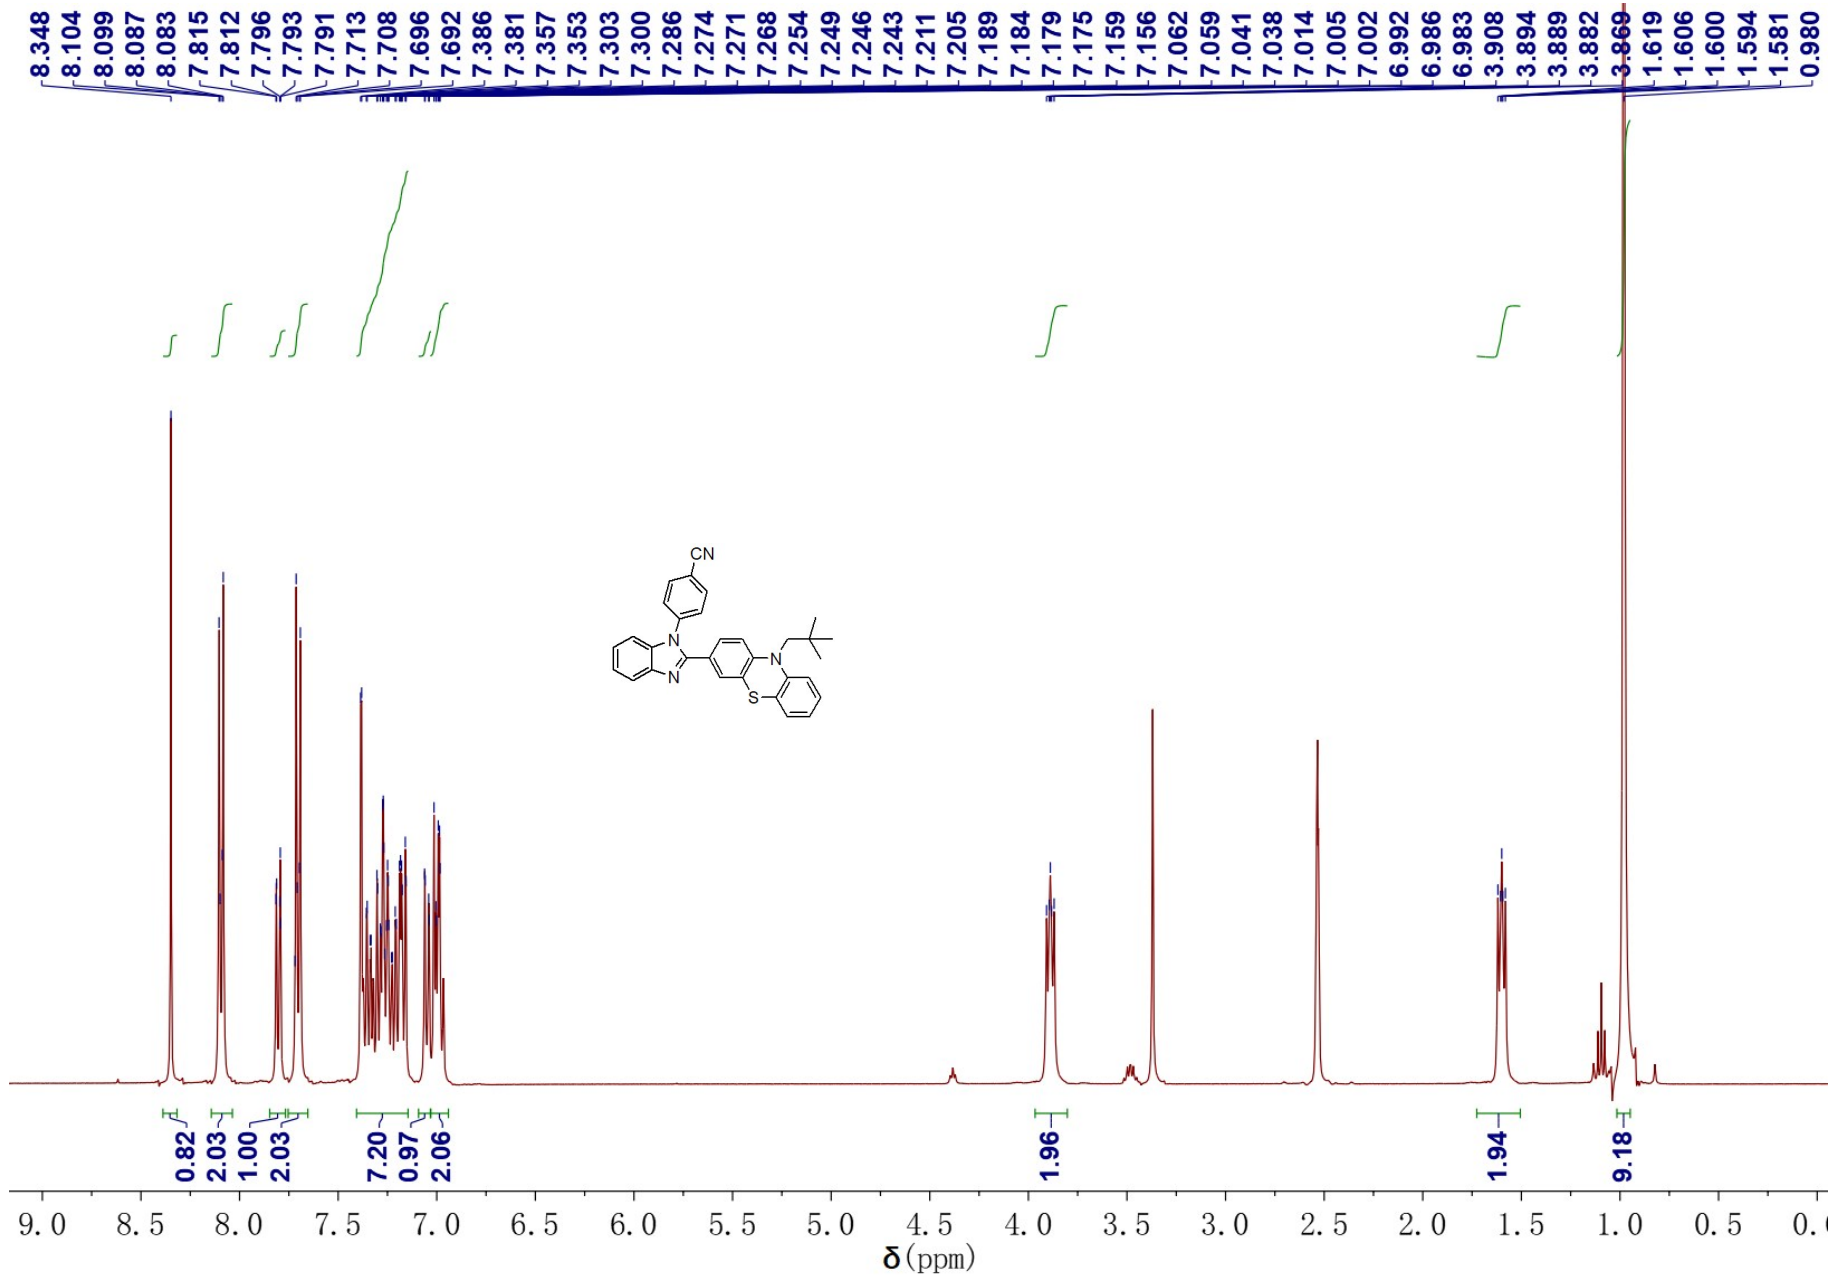

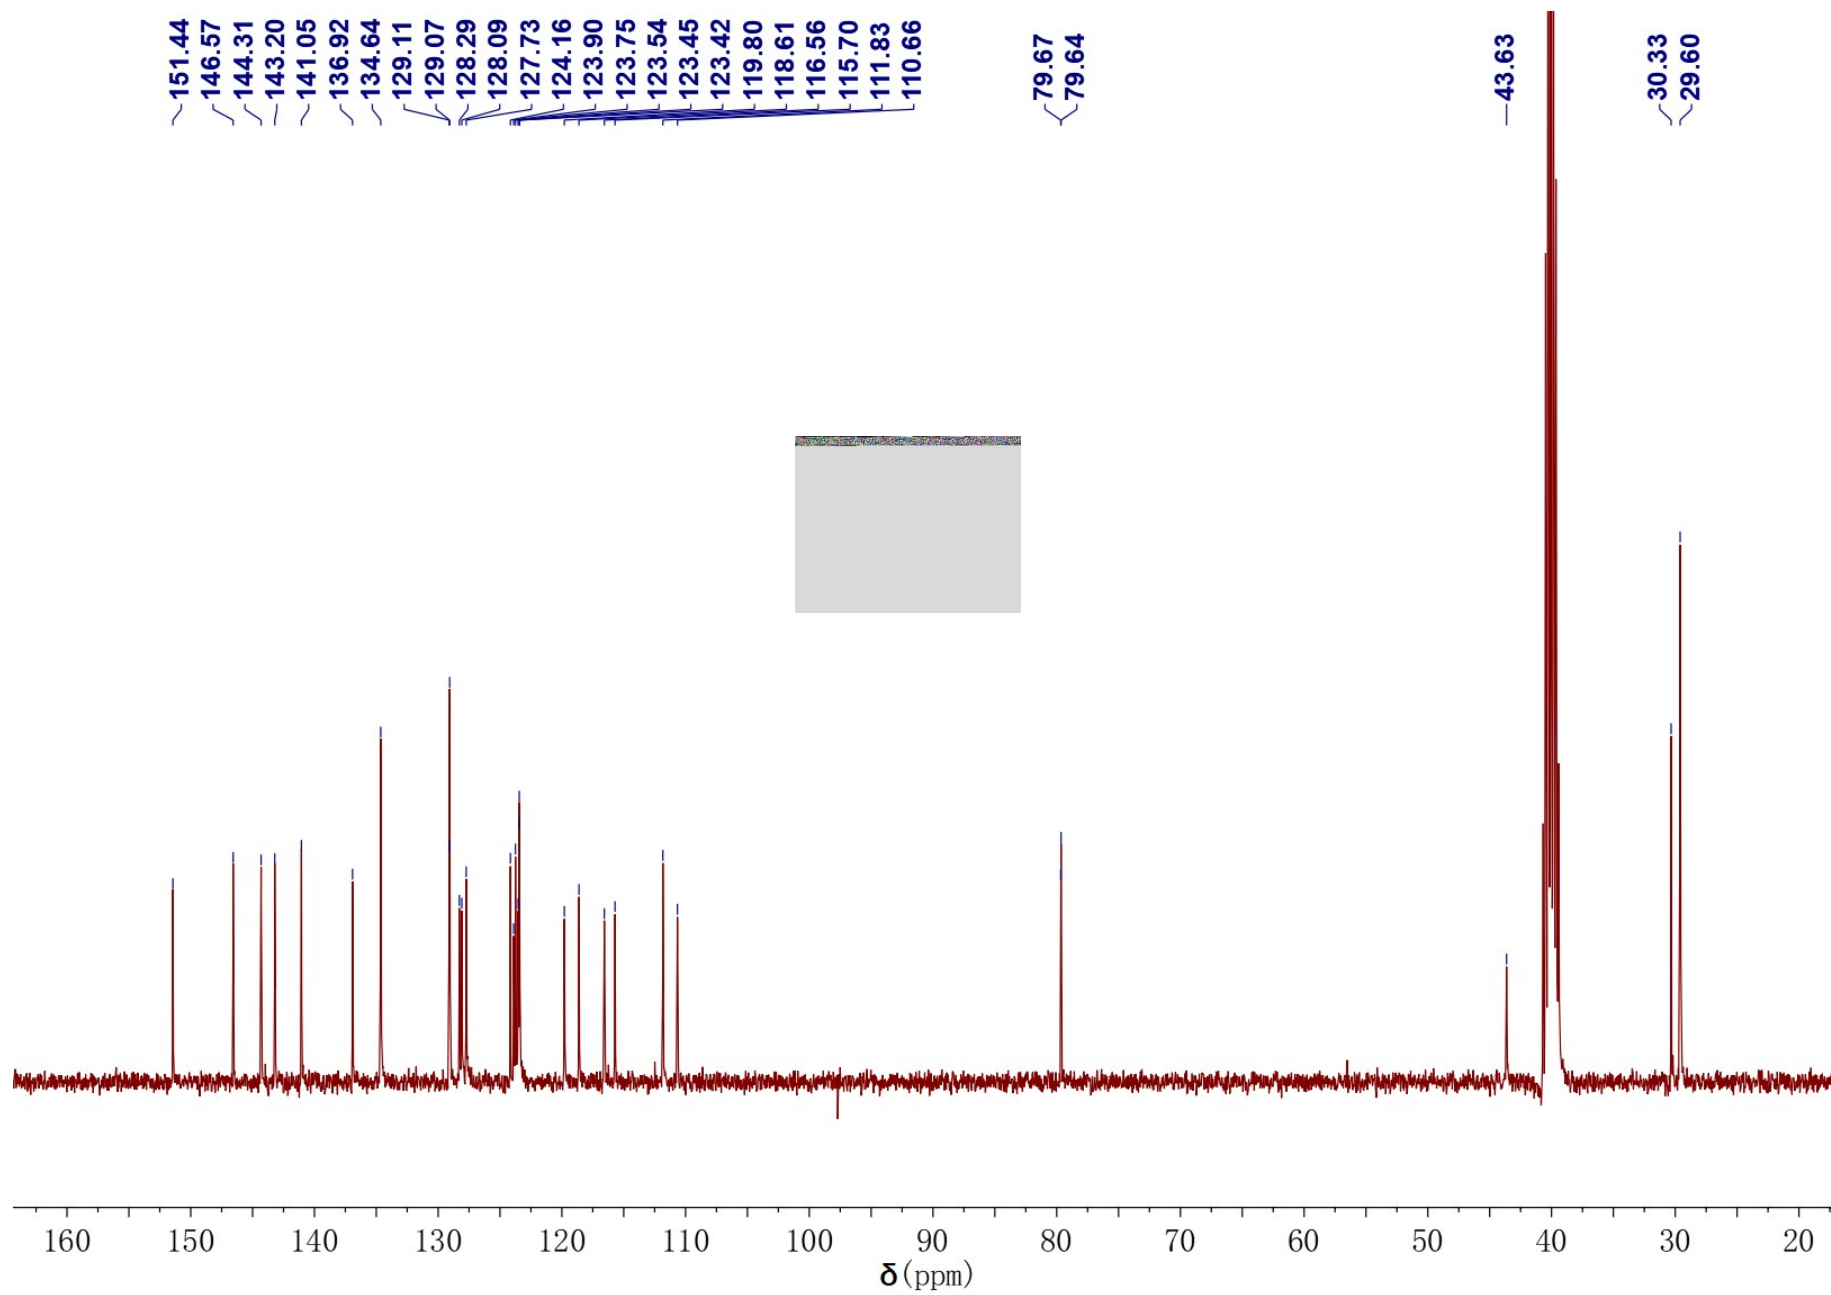

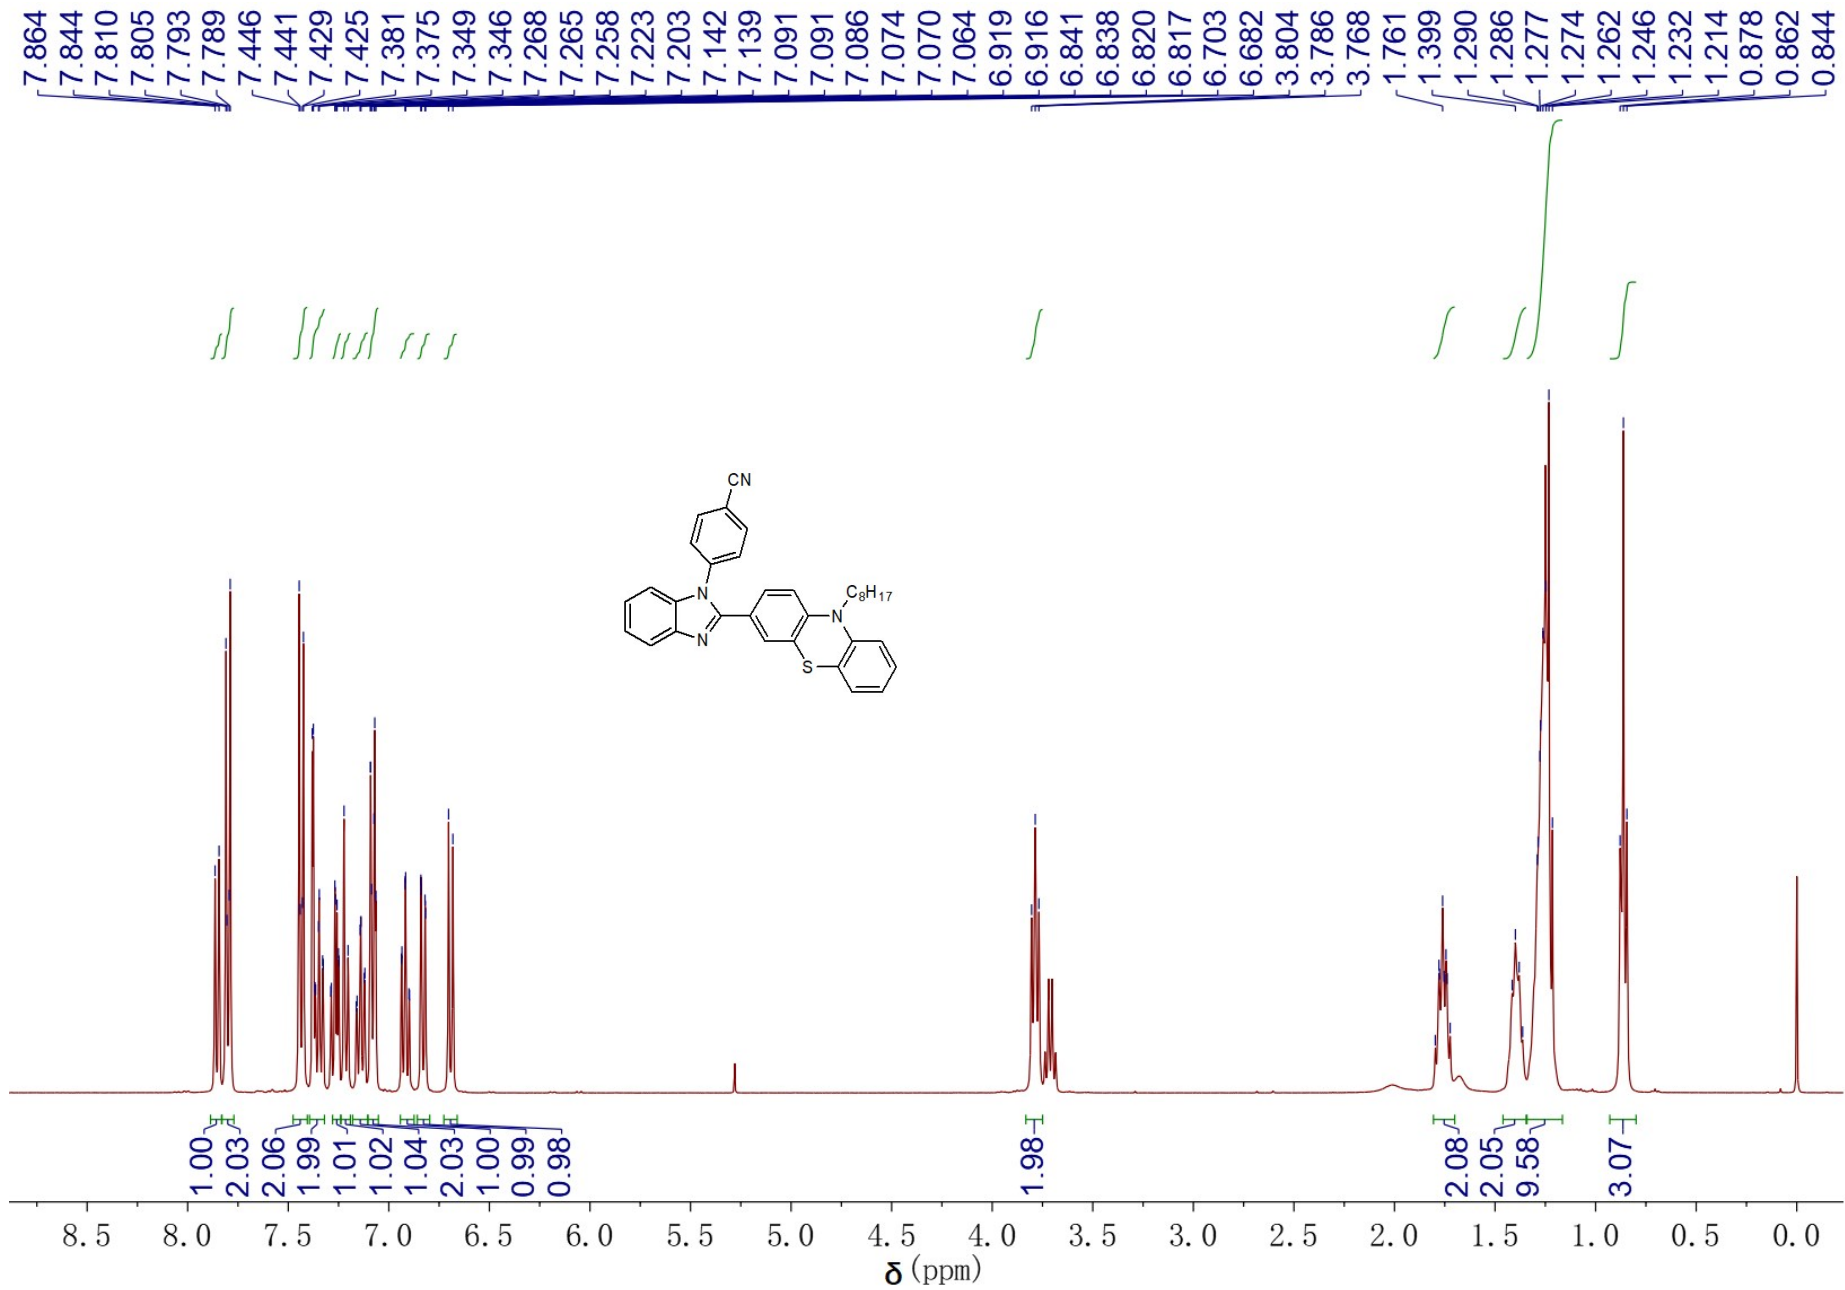

151.50  
146.77  
144.17  
143.20  
141.06  
136.29  
133.87  
128.42  
128.14  
128.06  
127.51  
127.44  
125.22  
123.97  
123.71  
123.61  
122.97  
122.93  
120.04  
117.90  
115.61  
114.70  
112.28  
109.78

-47.64

31.74  
29.20  
29.18  
26.88  
26.73  
22.63  
-14.12

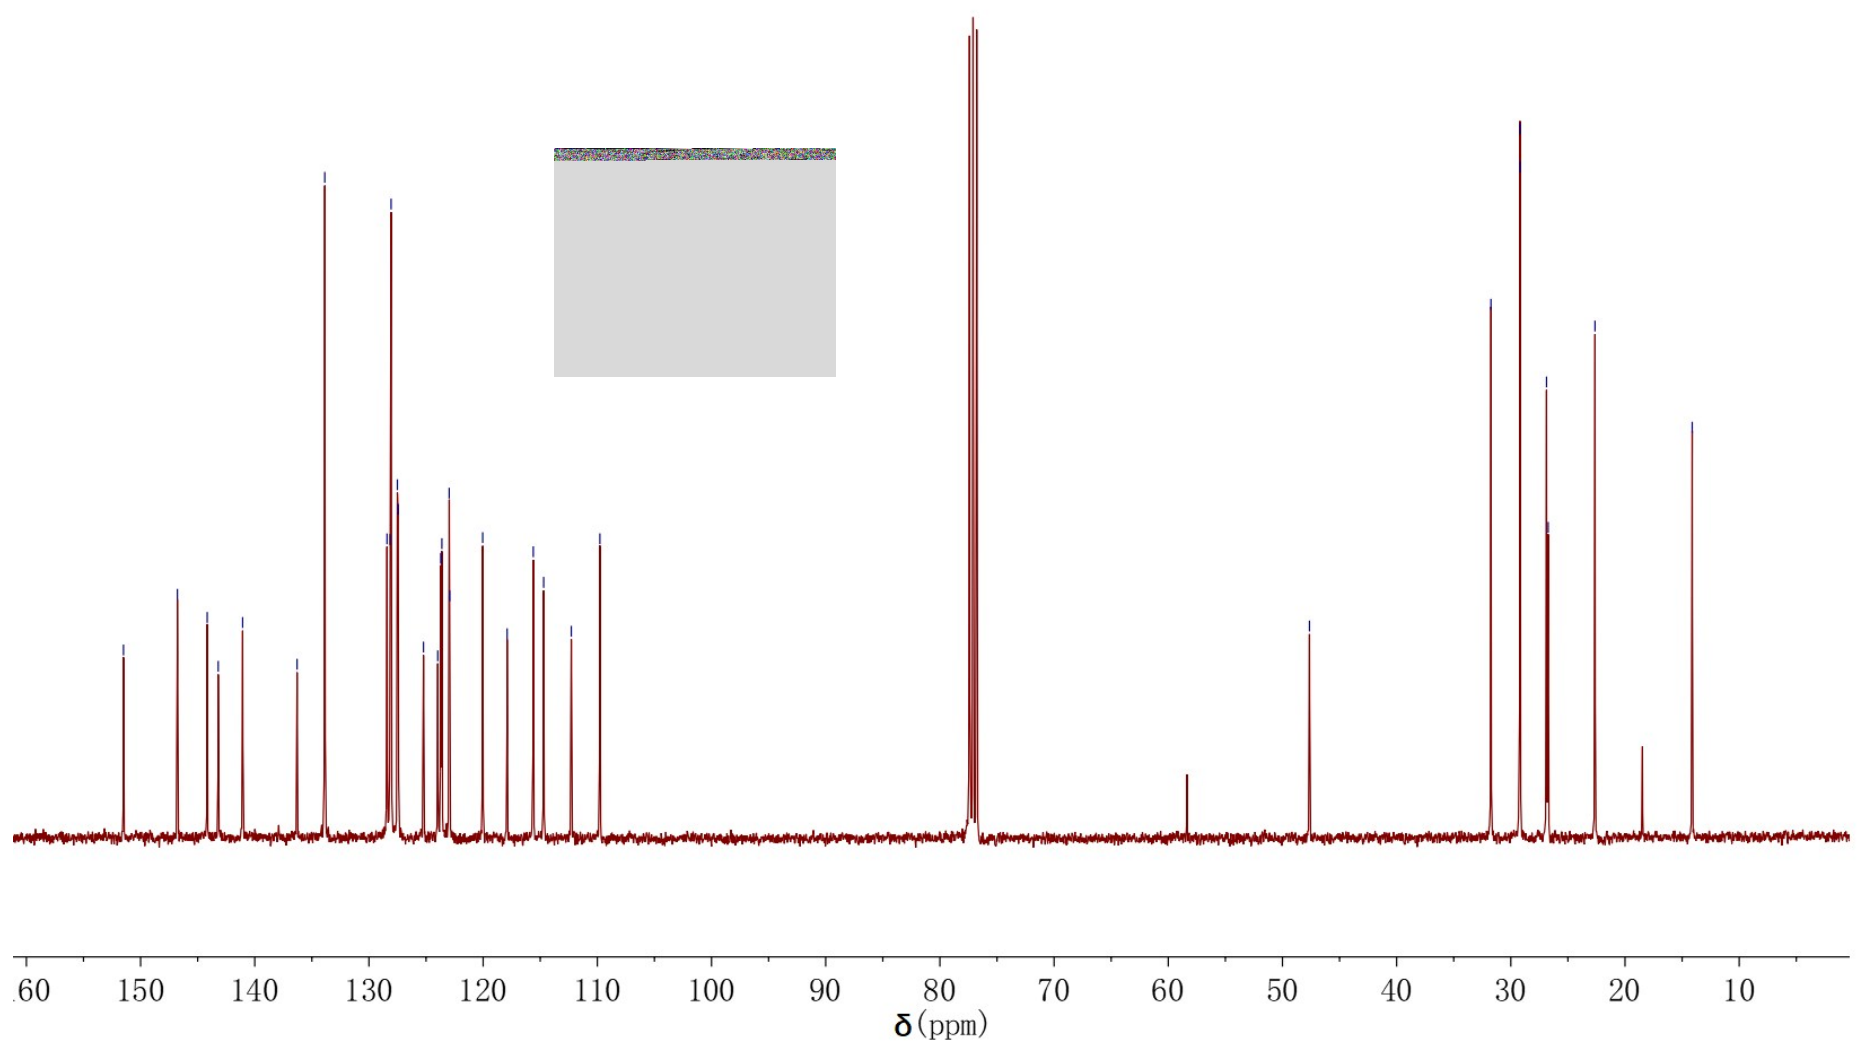

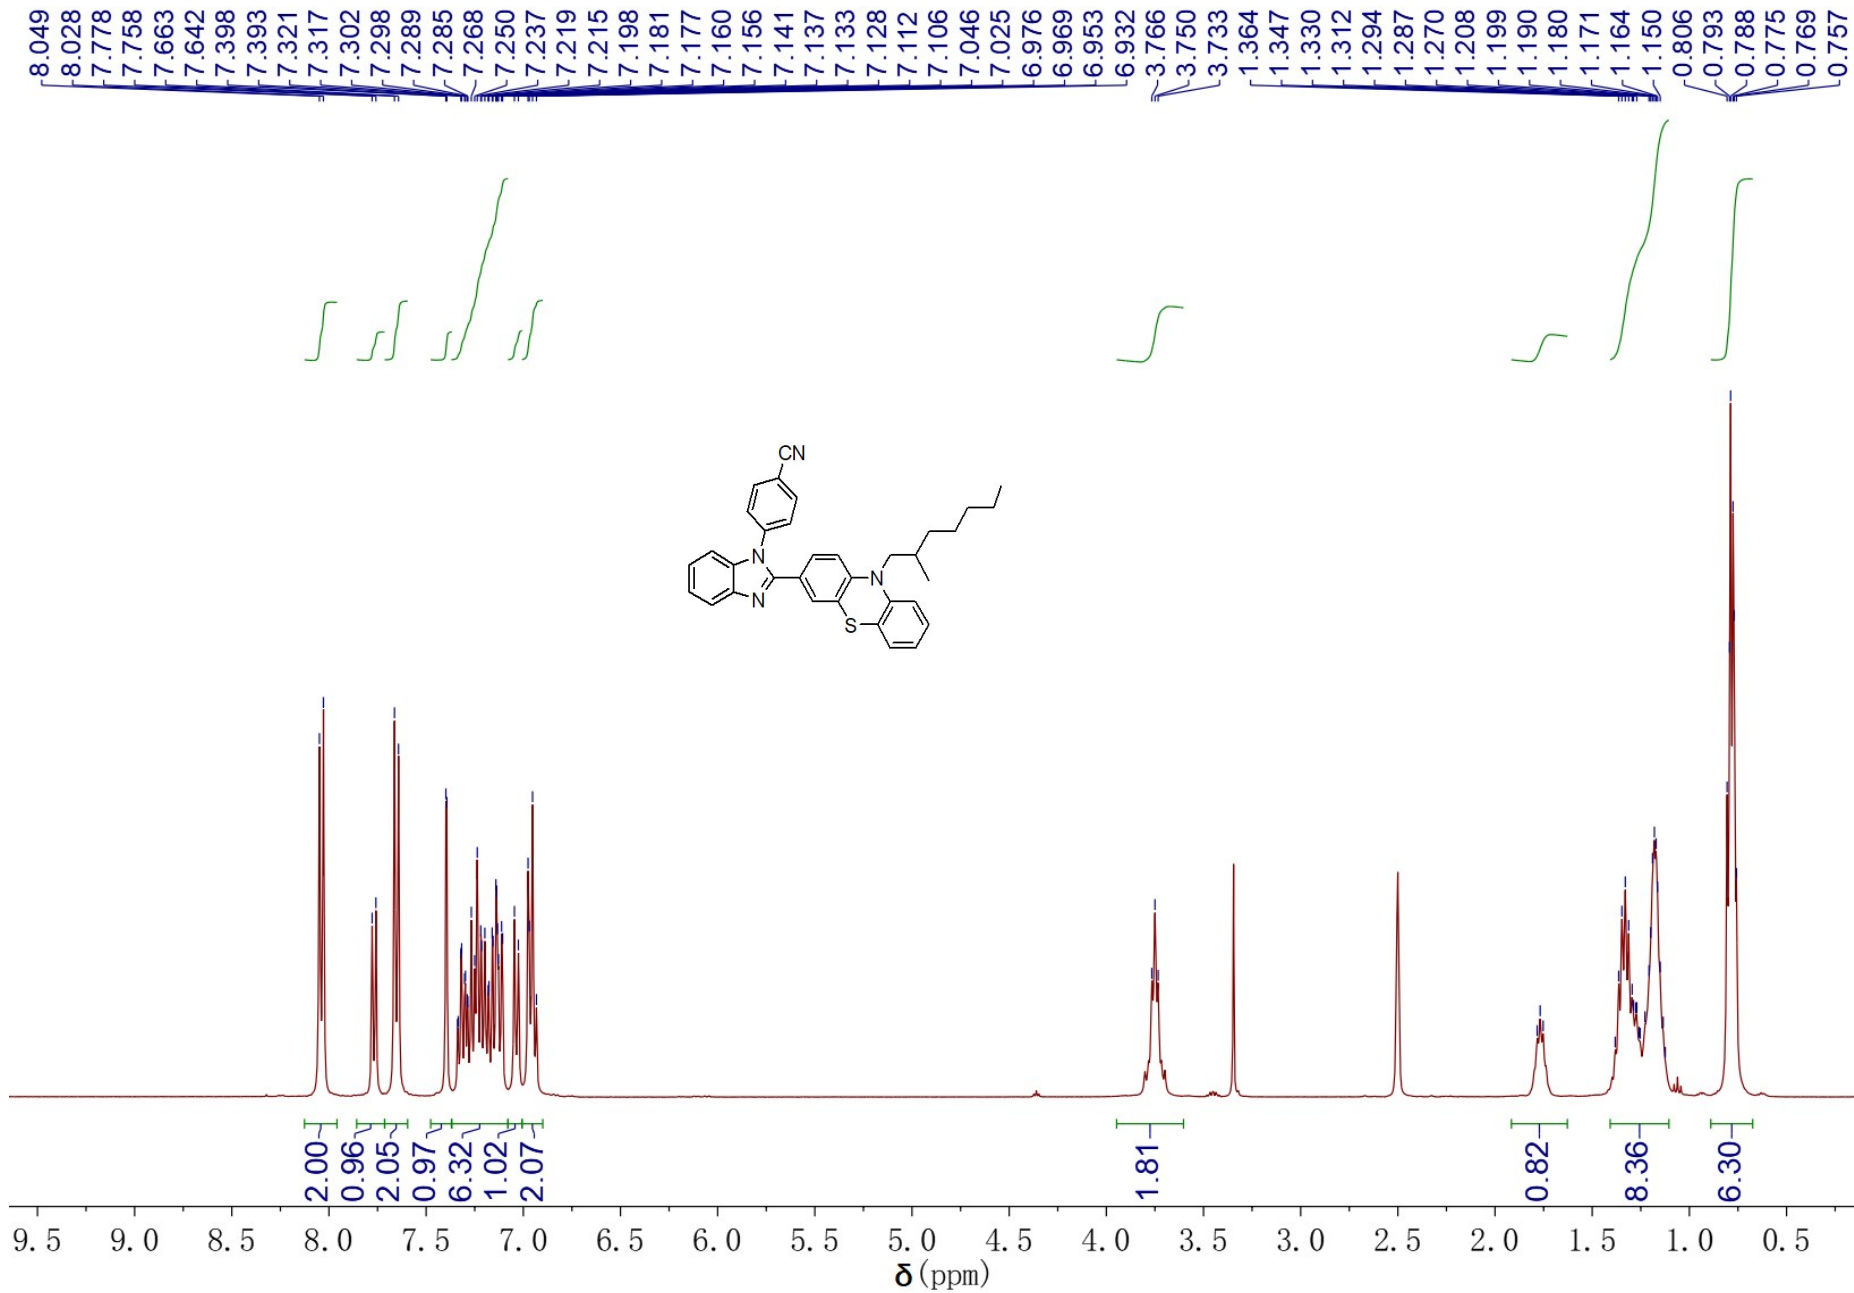

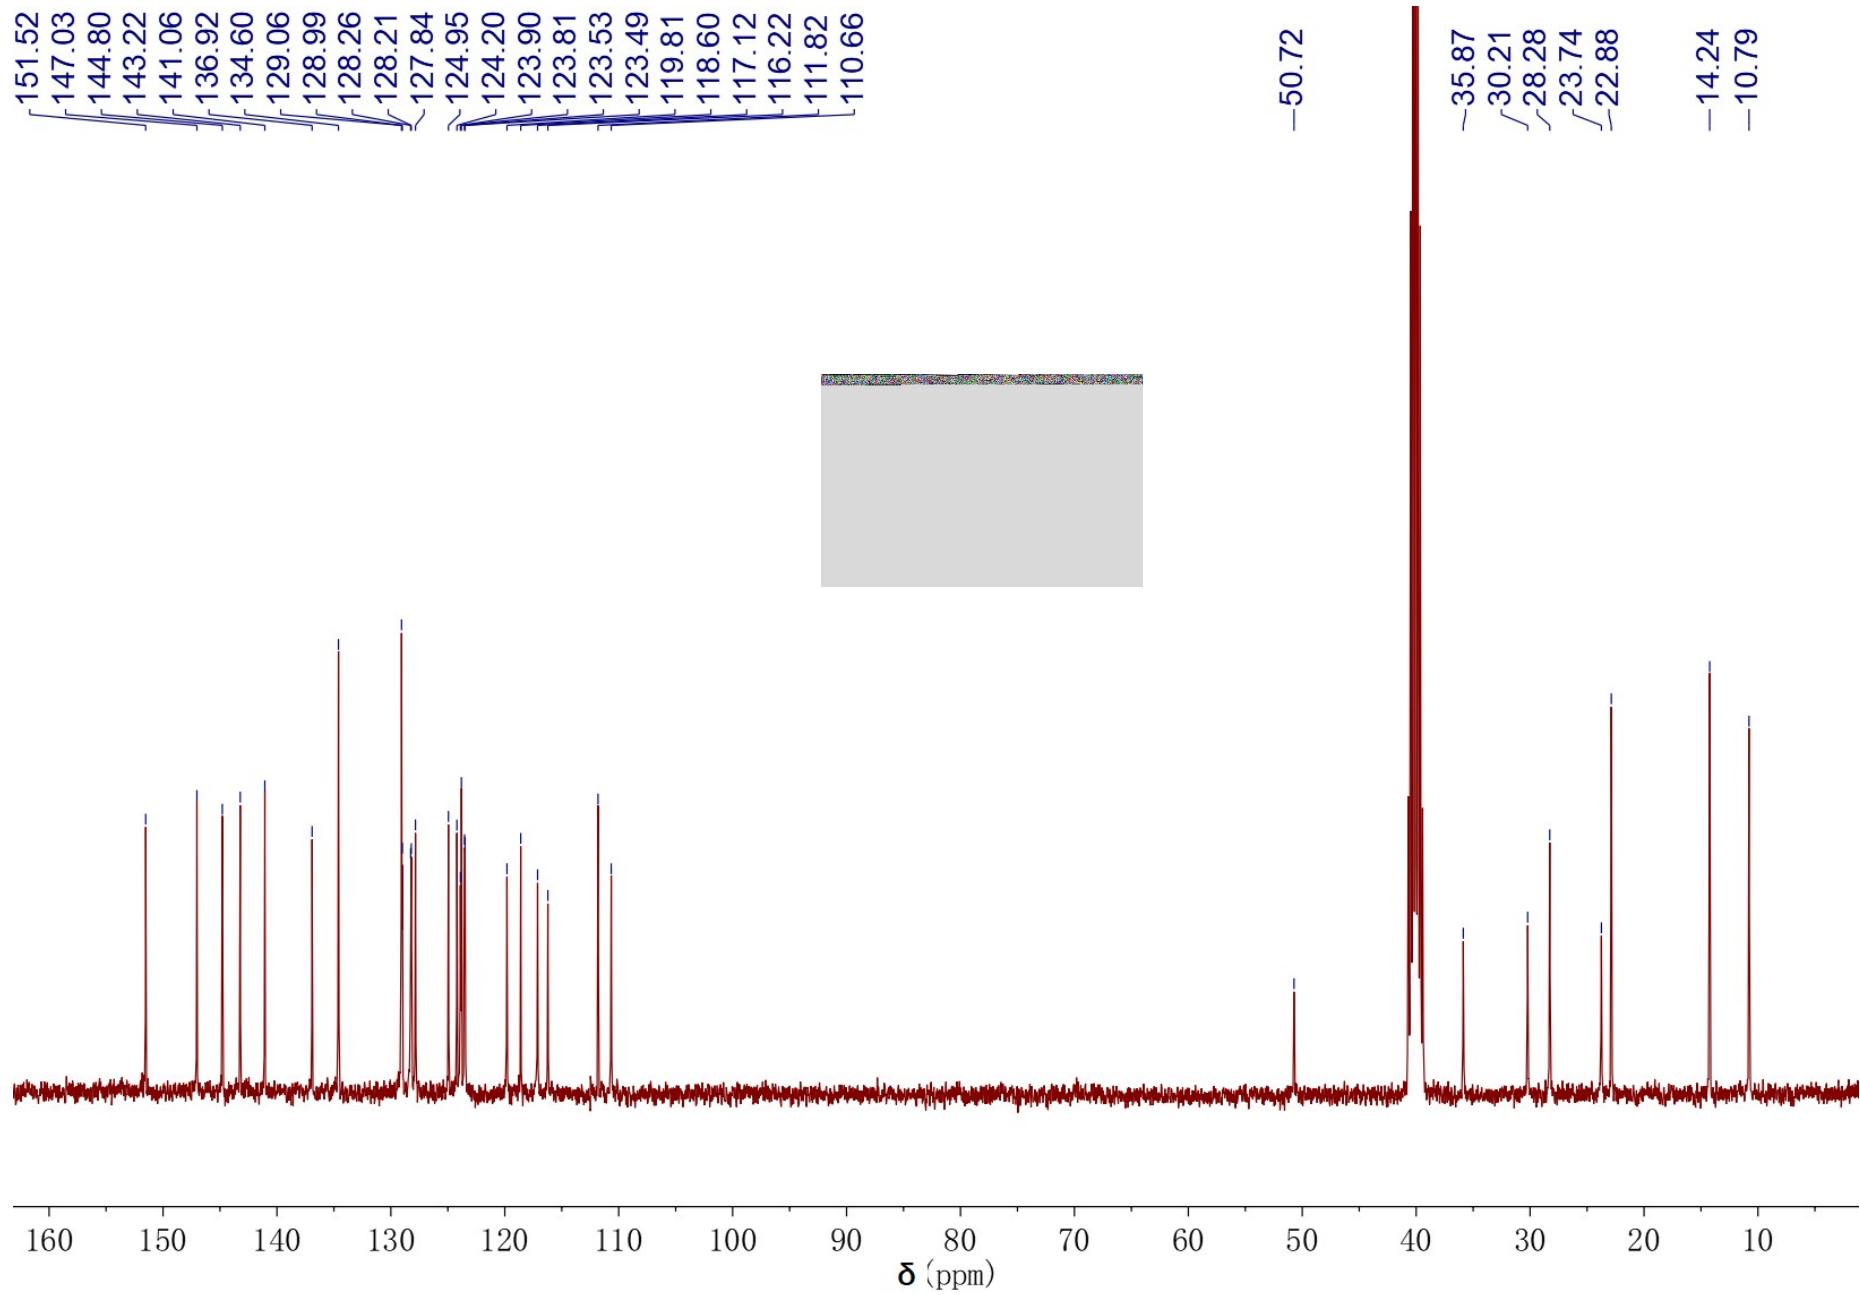

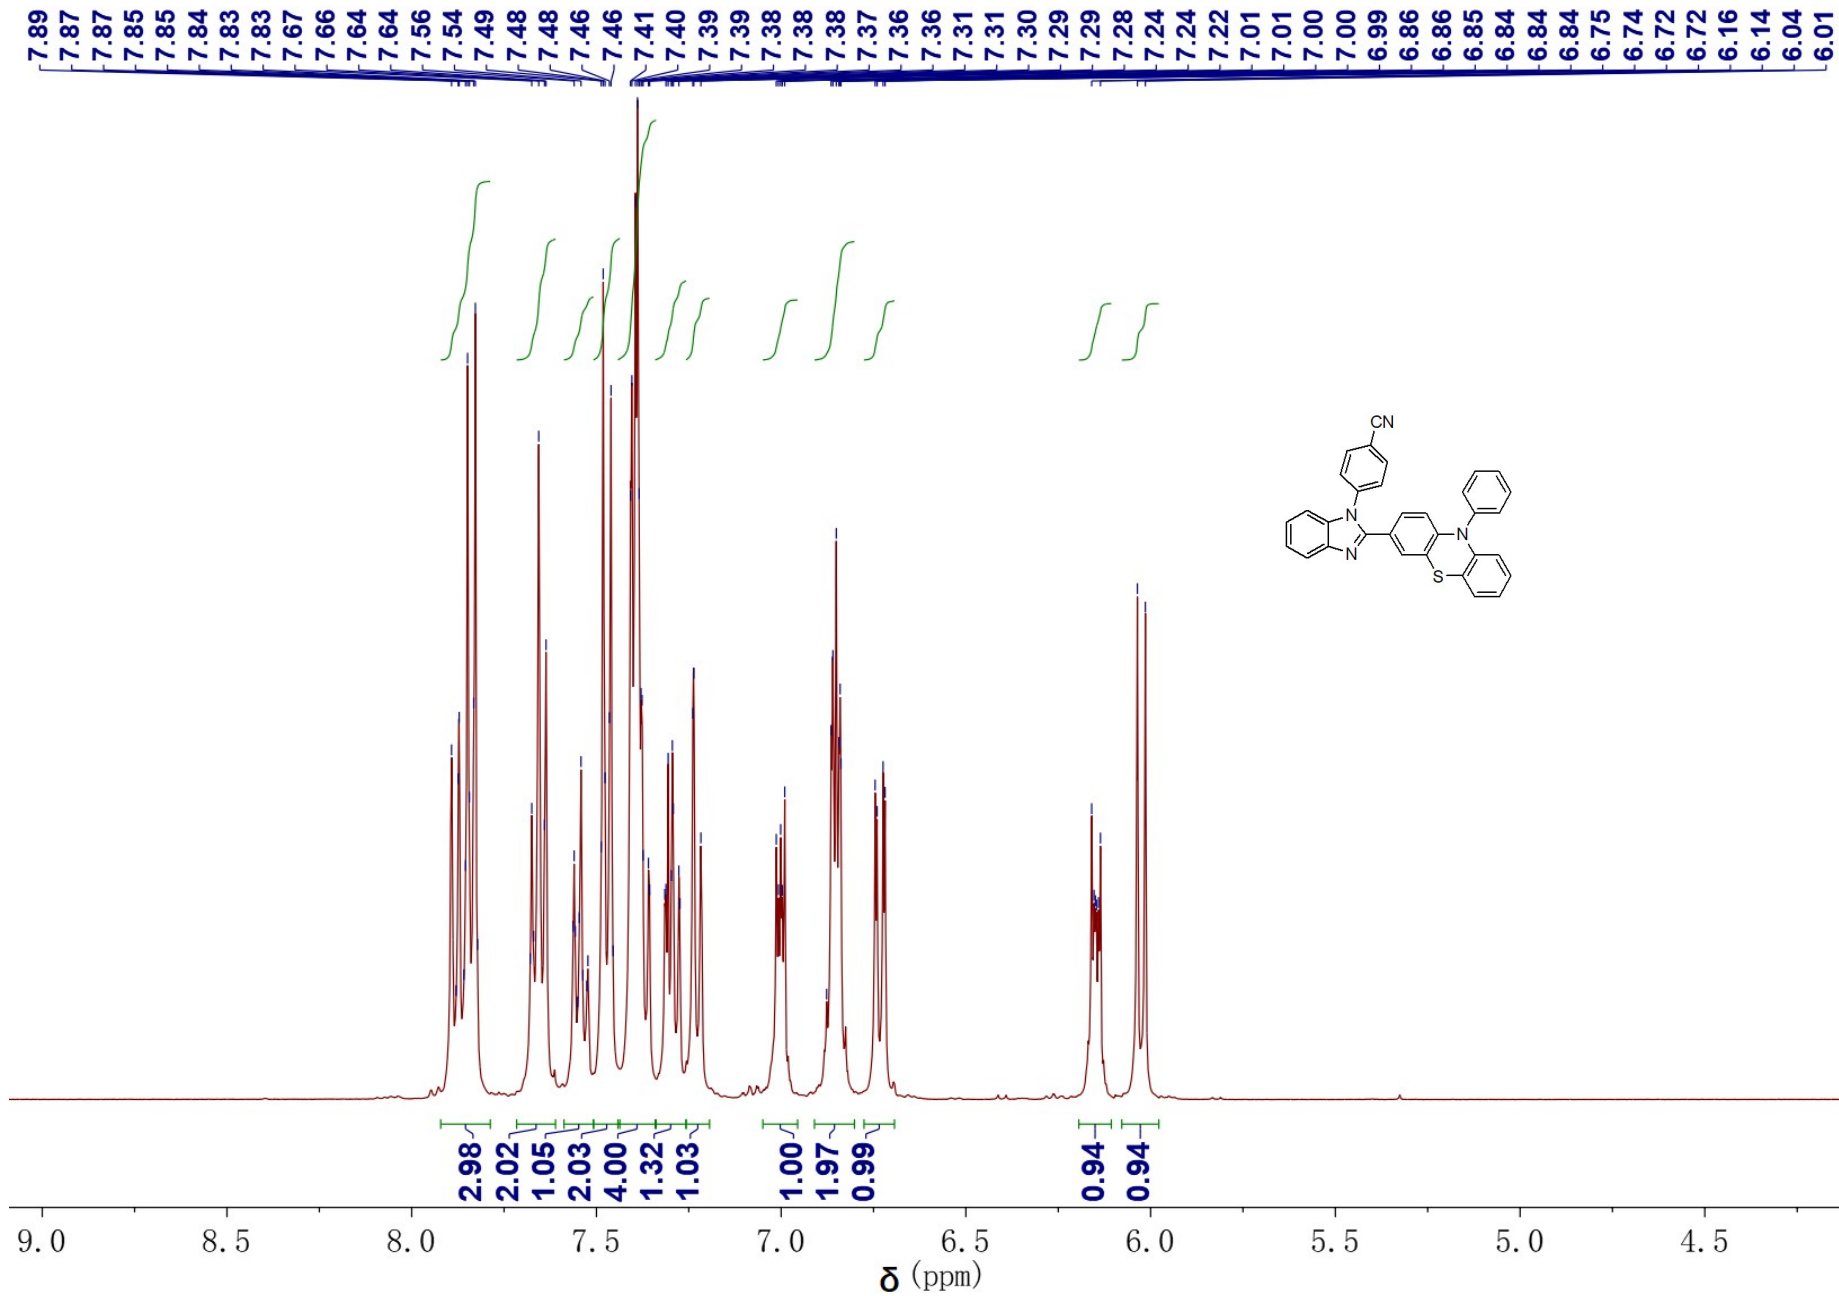



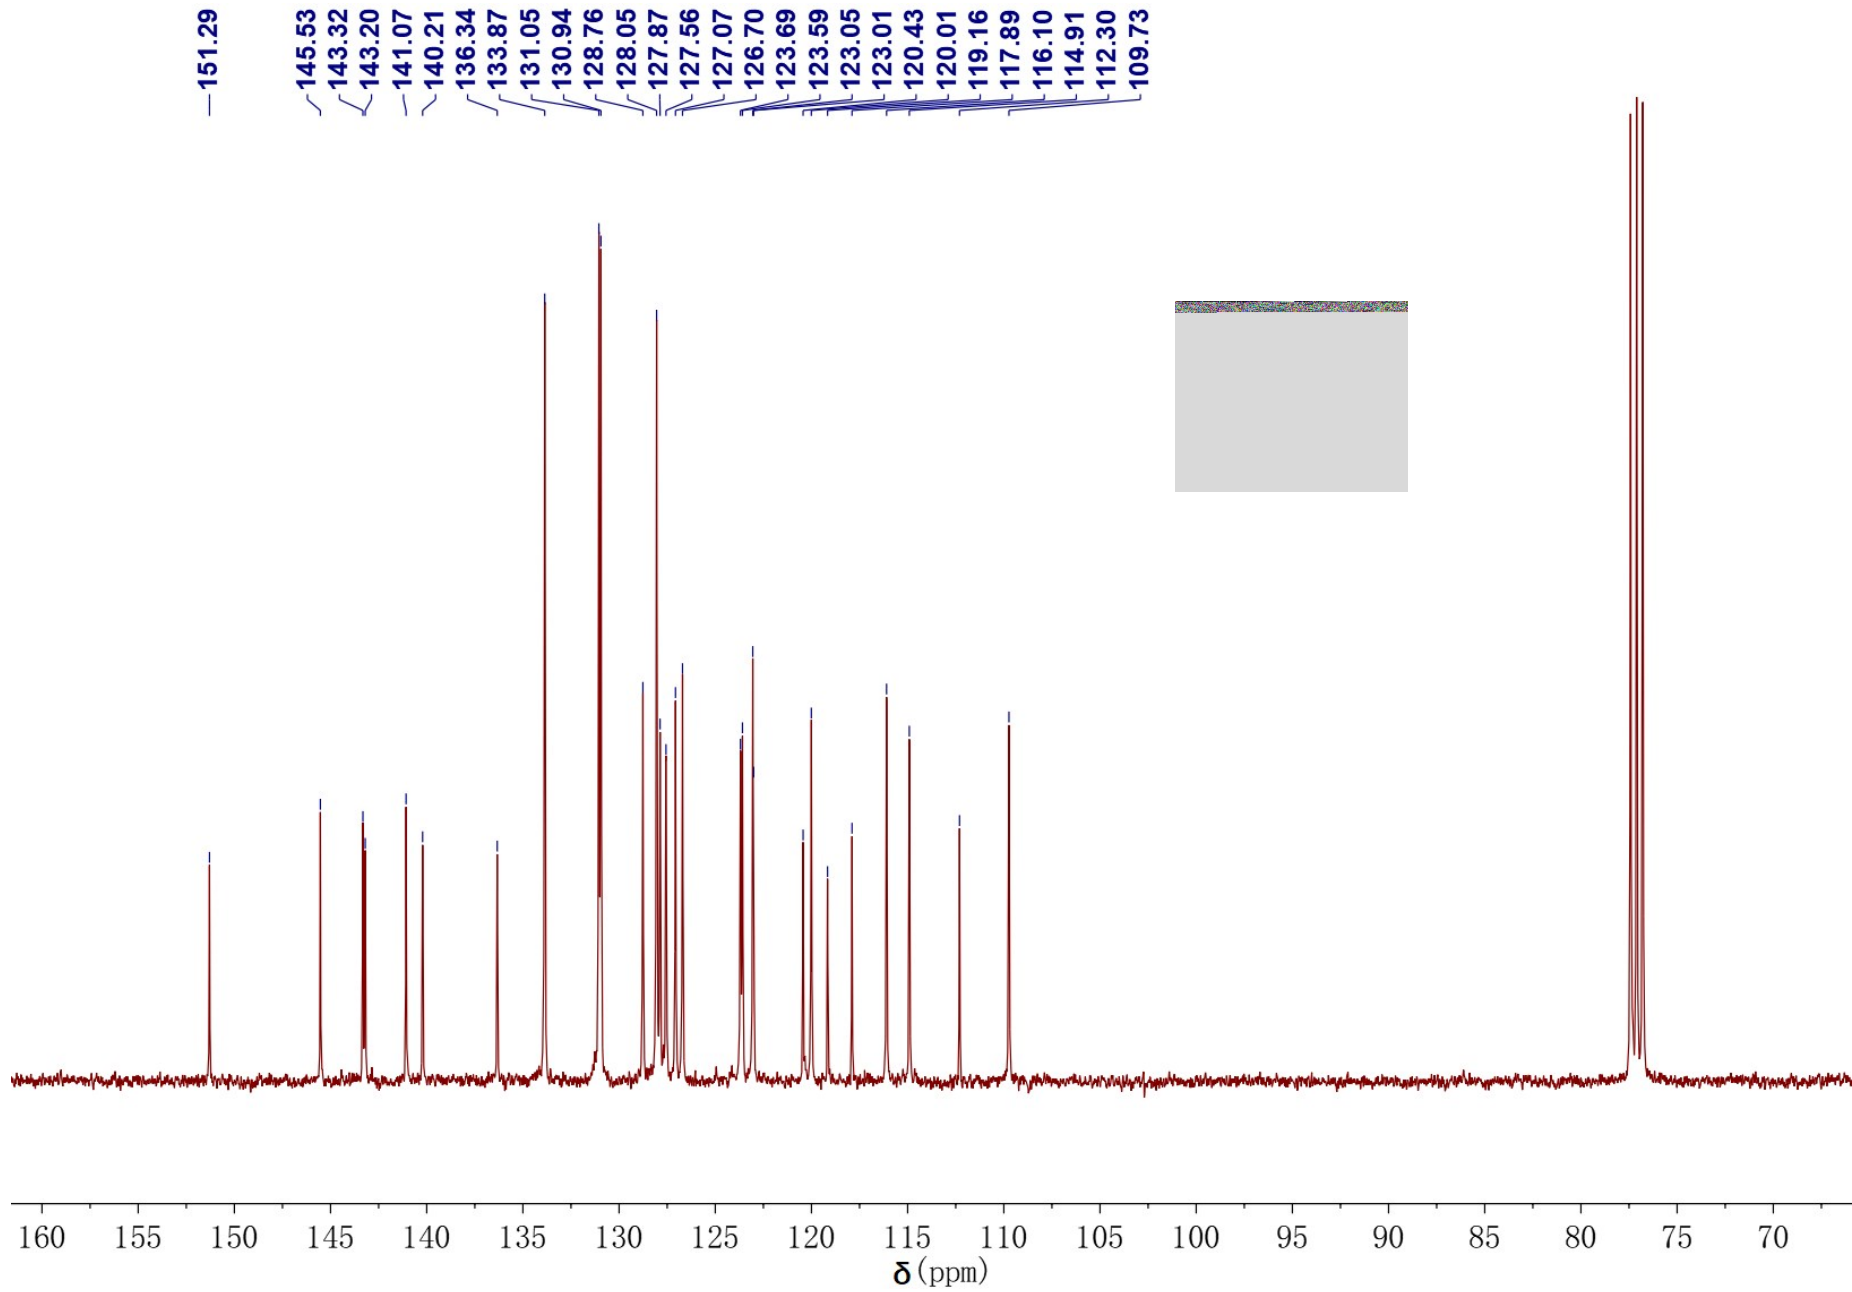

Supplement: c9ra05255k1.pdf [file c9ra05255k1.pdf]
